# Supplementary material for: Quantifying cell densities and biovolumes of phytoplankton communities and functional groups using scanning flow cytometry, machine learning and unsupervised clustering
Source: PubMed Central journal article supplement (PMC5945019; doi:10.1371/journal.pone.0196225), 2018-05-10

Red1Red2.ratio  
SWS.Total  
X2.FL.Red.Average  
X2.FL.Red.Total  
FL.Yellow.Range  
FL.Yellow.Maximum  
FL.Orange.Total  
FL.Red.Range  
FL.Red.Maximum  
X2.FL.Red.Last  
FL.Yellow.Average  
X2.FL.Red.Gradient  
X2.FL.Red.Maximum  
X2.FL.Red.Range  
FL.Yellow.Total  
X2.FL.Red.Center.of.gravity  
FL.Red.Average  
FL.Red.Total  
FWS.Center.of.gravity  
SWS.Inertia  
FL.Yellow.Center.of.gravity  
FL.Orange.Center.of.gravity  
FWS.Length  
FL.Yellow.Fill.factor  
FL.Orange.Number.of.cells  
FL.Yellow.Number.of.cells  
FL.Yellow.Inertia  
FL.Red.Center.of.gravity  
FL.Yellow.Length  
SWS.Minimum

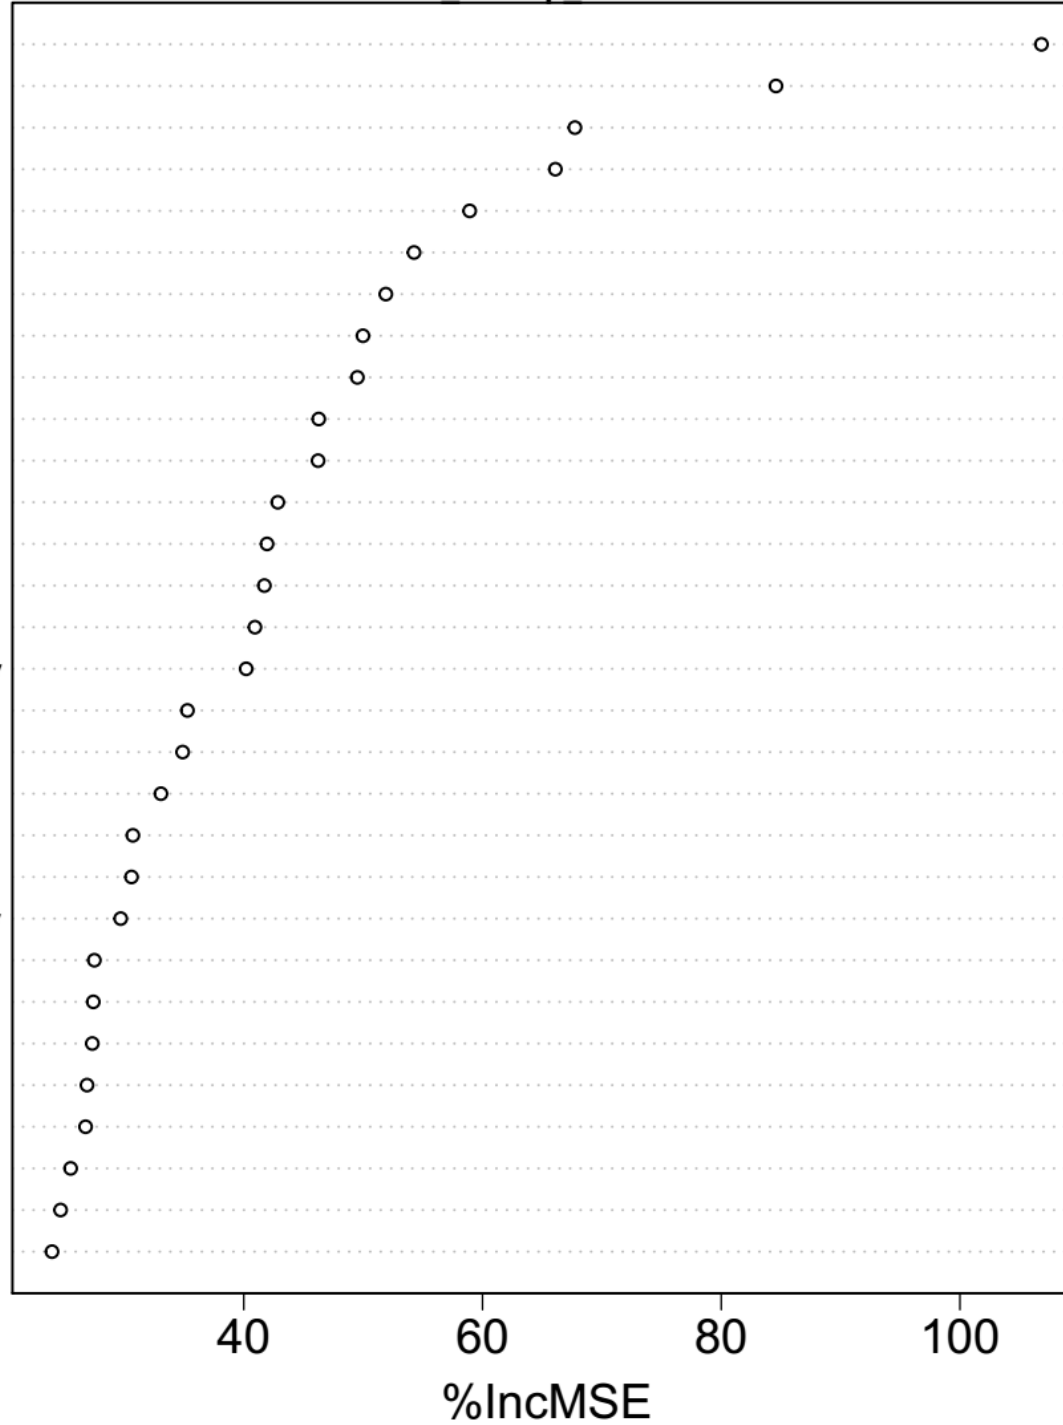

Supplement: pone.0196225.s005.pdf [file pone.0196225.s005.pdf]
