# Supplementary material for: Quantifying cell densities and biovolumes of phytoplankton communities and functional groups using scanning flow cytometry, machine learning and unsupervised clustering
Source: PLoS One. 2018 May 10;13(5):e0196225. doi: 10.1371/journal.pone.0196225 (PMC5945019; doi:10.1371/journal.pone.0196225)
Supplement: S1 Dataset — (CSV) [file pone.0196225.s014.csv]

taxon	density	date	hour	depth	group
Bicosoeca sp.	0	16/07/2014	12	1	chrysophytes
Bitrichia chodatii	57.66666667	16/07/2014	12	1	chrysophytes
Chromulina sp.	0	16/07/2014	12	1	chrysophytes
Dinobryon bavaricum	0	16/07/2014	12	1	chrysophytes
Dinobryon divergens	154.6666667	16/07/2014	12	1	chrysophytes
Dinobryon soziale	0	16/07/2014	12	1	chrysophytes
Div. Chrysoflagellaten	0	16/07/2014	12	1	chrysophytes
Erkenia sp.	1150	16/07/2014	12	1	chrysophytes
Kephyrion sp.	0	16/07/2014	12	1	chrysophytes
Mallomonas acaroides	0	16/07/2014	12	1	chrysophytes
Ochromonas sp.	0	16/07/2014	12	1	chrysophytes
Pseudopedinella erk.	0	16/07/2014	12	1	chrysophytes
Salpingoeca sp.	0	16/07/2014	12	1	chrysophytes
Chroomonas sp.	0	16/07/2014	12	1	cryptophytes
Cryptomonas sp.	98.33333333	16/07/2014	12	1	cryptophytes
Cyathomonas truncata	0	16/07/2014	12	1	cryptophytes
Div. Cryptophyceen	0	16/07/2014	12	1	cryptophytes
Katablephris sp.	0	16/07/2014	12	1	cryptophytes
Rhodomonas sp.	920	16/07/2014	12	1	cryptophytes
Anabena fl.-aq.	0	16/07/2014	12	1	cyanobacteria
Anabena solitaria	0	16/07/2014	12	1	cyanobacteria
Aphanizomenon fl.-aq.	0	16/07/2014	12	1	cyanobacteria
Aphanocapsa elachista	0	16/07/2014	12	1	cyanobacteria
Aphanothece sp.	0	16/07/2014	12	1	cyanobacteria
Chroococcus sp.	0	16/07/2014	12	1	cyanobacteria
Coelosphaerium sp.	0	16/07/2014	12	1	cyanobacteria
Leptothrix echinata	0	16/07/2014	12	1	cyanobacteria
Microcystis aerug.	0	16/07/2014	12	1	cyanobacteria
Microcystis sp.	0	16/07/2014	12	1	cyanobacteria
Pseudoanabena sp.	0	16/07/2014	12	1	cyanobacteria
Spirulina sp.	0	16/07/2014	12	1	cyanobacteria
Synechococcus	460	16/07/2014	12	1	cyanobacteria
Woronichinia aponina	0	16/07/2014	12	1	cyanobacteria
Woronichinia naeg.	0	16/07/2014	12	1	cyanobacteria
Closterium ac. var. variab.	0	16/07/2014	12	1	desmids
Closterium acutum	0	16/07/2014	12	1	desmids
Closterium pronum	0	16/07/2014	12	1	desmids
Closterium sp.	0	16/07/2014	12	1	desmids
Cosmarium depr. plankt.	14	16/07/2014	12	1	desmids
Cosmarium sp.	0	16/07/2014	12	1	desmids
Mougeotia sp.	0	16/07/2014	12	1	desmids
Staurastrum sp.	0	16/07/2014	12	1	desmids
Achnanthes sp.	0	16/07/2014	12	1	diatoms
Asterionella formosa	210.6666667	16/07/2014	12	1	diatoms
Cocconeis sp.	0	16/07/2014	12	1	diatoms
Cyclotella comta	56.33333333	16/07/2014	12	1	diatoms
Cyclotella klein bis 7µ Ø	57.66666667	16/07/2014	12	1	diatoms
Cyclotella sp.	0	16/07/2014	12	1	diatoms
Cymbella sp.	0	16/07/2014	12	1	diatoms
Diatoma sp.	0	16/07/2014	12	1	diatoms
Fragilaria capucina	0	16/07/2014	12	1	diatoms
Fragilaria crotonensis	70.33333333	16/07/2014	12	1	diatoms
Melosira sp.	0	16/07/2014	12	1	diatoms
Navicula sp.	0	16/07/2014	12	1	diatoms
Nitzschia acicularis	0	16/07/2014	12	1	diatoms
Nitzschia sp.	0	16/07/2014	12	1	diatoms
Stephanodiscus klein bis 7µ Ø	115	16/07/2014	12	1	diatoms
Stephanodiscus sp.	0	16/07/2014	12	1	diatoms
Synedra acus	0	16/07/2014	12	1	diatoms
Synedra acus ang.	0	16/07/2014	12	1	diatoms
Synedra cyclopum	0	16/07/2014	12	1	diatoms
Ceratium hirundinella	0	16/07/2014	12	1	dinoflagellates
Cysten von Ceratium	0	16/07/2014	12	1	dinoflagellates
Gymnodinium helv.	0	16/07/2014	12	1	dinoflagellates
Gymnodinium lantzschii	0	16/07/2014	12	1	dinoflagellates
Gymnodinium sp.	0	16/07/2014	12	1	dinoflagellates
Peridinium aciculiferum	0	16/07/2014	12	1	dinoflagellates
Peridinium cinctum	0	16/07/2014	12	1	dinoflagellates
Peridinium willei	0	16/07/2014	12	1	dinoflagellates
Sonstige Dinocysten	0	16/07/2014	12	1	dinoflagellates
Euglena sp.	0	16/07/2014	12	1	euglenophytes
Ankyra ancora	14	16/07/2014	12	1	greens
Botryococcus braunii	0	16/07/2014	12	1	greens
Carteria sp. (Tetraselmis)	0	16/07/2014	12	1	greens
Chlamydomonas sp.	115	16/07/2014	12	1	greens
Chlorella sp.	0	16/07/2014	12	1	greens
Coelastrum microporum	0	16/07/2014	12	1	greens
Coelastrum reticulatum	0	16/07/2014	12	1	greens
Crucigenia sp.	920	16/07/2014	12	1	greens
Crucigenia tetrapedia	230	16/07/2014	12	1	greens
Div. Chloro 7 µ Ø	0	16/07/2014	12	1	greens
Elakatothrix gelatinosa	0	16/07/2014	12	1	greens
Eutetramorus sp.	0	16/07/2014	12	1	greens
Hormidium	0	16/07/2014	12	1	greens
Kirchneriella sp.	0	16/07/2014	12	1	greens
Lagerheimia sp.	115	16/07/2014	12	1	greens
Monoraphidium minutum	0	16/07/2014	12	1	greens
Monoraphidium sp.	0	16/07/2014	12	1	greens
Nephrocytium	0	16/07/2014	12	1	greens
Pediastrum boryanum	0	16/07/2014	12	1	greens
Pediastrum duplex	0	16/07/2014	12	1	greens
Phacotus sp.	140.6666667	16/07/2014	12	1	greens
Scenedesmus acuminatus	0	16/07/2014	12	1	greens
Scenedesmus armatus	0	16/07/2014	12	1	greens
Scenedesmus linearis	0	16/07/2014	12	1	greens
Tetraedron minimum	0	16/07/2014	12	1	greens
Bicosoeca sp.	0	16/07/2014	12	2.5	chrysophytes
Bitrichia chodatii	57.66666667	16/07/2014	12	2.5	chrysophytes
Chromulina sp.	0	16/07/2014	12	2.5	chrysophytes
Dinobryon bavaricum	0	16/07/2014	12	2.5	chrysophytes
Dinobryon divergens	168.6666667	16/07/2014	12	2.5	chrysophytes
Dinobryon soziale	0	16/07/2014	12	2.5	chrysophytes
Div. Chrysoflagellaten	0	16/07/2014	12	2.5	chrysophytes
Erkenia sp.	1667.666667	16/07/2014	12	2.5	chrysophytes
Kephyrion sp.	0	16/07/2014	12	2.5	chrysophytes
Mallomonas acaroides	0	16/07/2014	12	2.5	chrysophytes
Ochromonas sp.	0	16/07/2014	12	2.5	chrysophytes
Pseudopedinella erk.	0	16/07/2014	12	2.5	chrysophytes
Salpingoeca sp.	0	16/07/2014	12	2.5	chrysophytes
Chroomonas sp.	0	16/07/2014	12	2.5	cryptophytes
Cryptomonas sp.	295	16/07/2014	12	2.5	cryptophytes
Cyathomonas truncata	0	16/07/2014	12	2.5	cryptophytes
Div. Cryptophyceen	0	16/07/2014	12	2.5	cryptophytes
Katablephris sp.	115	16/07/2014	12	2.5	cryptophytes
Rhodomonas sp.	1840	16/07/2014	12	2.5	cryptophytes
Anabena fl.-aq.	0	16/07/2014	12	2.5	cyanobacteria
Anabena solitaria	0	16/07/2014	12	2.5	cyanobacteria
Aphanizomenon fl.-aq.	0	16/07/2014	12	2.5	cyanobacteria
Aphanocapsa elachista	0	16/07/2014	12	2.5	cyanobacteria
Aphanothece sp.	0	16/07/2014	12	2.5	cyanobacteria
Chroococcus sp.	28	16/07/2014	12	2.5	cyanobacteria
Coelosphaerium sp.	0	16/07/2014	12	2.5	cyanobacteria
Leptothrix echinata	0	16/07/2014	12	2.5	cyanobacteria
Microcystis aerug.	0	16/07/2014	12	2.5	cyanobacteria
Microcystis sp.	0	16/07/2014	12	2.5	cyanobacteria
Pseudoanabena sp.	0	16/07/2014	12	2.5	cyanobacteria
Spirulina sp.	0	16/07/2014	12	2.5	cyanobacteria
Synechococcus	287.6666667	16/07/2014	12	2.5	cyanobacteria
Woronichinia aponina	0	16/07/2014	12	2.5	cyanobacteria
Woronichinia naeg.	0	16/07/2014	12	2.5	cyanobacteria
Closterium ac. var. variab.	0	16/07/2014	12	2.5	desmids
Closterium acutum	0	16/07/2014	12	2.5	desmids
Closterium pronum	0	16/07/2014	12	2.5	desmids
Closterium sp.	0	16/07/2014	12	2.5	desmids
Cosmarium depr. plankt.	0	16/07/2014	12	2.5	desmids
Cosmarium sp.	0	16/07/2014	12	2.5	desmids
Mougeotia sp.	0	16/07/2014	12	2.5	desmids
Staurastrum sp.	0	16/07/2014	12	2.5	desmids
Achnanthes sp.	0	16/07/2014	12	2.5	diatoms
Asterionella formosa	126.3333333	16/07/2014	12	2.5	diatoms
Cocconeis sp.	0	16/07/2014	12	2.5	diatoms
Cyclotella comta	14	16/07/2014	12	2.5	diatoms
Cyclotella klein bis 7µ Ø	115	16/07/2014	12	2.5	diatoms
Cyclotella sp.	0	16/07/2014	12	2.5	diatoms
Cymbella sp.	0	16/07/2014	12	2.5	diatoms
Diatoma sp.	0	16/07/2014	12	2.5	diatoms
Fragilaria capucina	0	16/07/2014	12	2.5	diatoms
Fragilaria crotonensis	84.33333333	16/07/2014	12	2.5	diatoms
Melosira sp.	0	16/07/2014	12	2.5	diatoms
Navicula sp.	0	16/07/2014	12	2.5	diatoms
Nitzschia acicularis	0	16/07/2014	12	2.5	diatoms
Nitzschia sp.	0	16/07/2014	12	2.5	diatoms
Stephanodiscus klein bis 7µ Ø	115	16/07/2014	12	2.5	diatoms
Stephanodiscus sp.	0	16/07/2014	12	2.5	diatoms
Synedra acus	0	16/07/2014	12	2.5	diatoms
Synedra acus ang.	14	16/07/2014	12	2.5	diatoms
Synedra cyclopum	0	16/07/2014	12	2.5	diatoms
Ceratium hirundinella	0	16/07/2014	12	2.5	dinoflagellates
Cysten von Ceratium	0	16/07/2014	12	2.5	dinoflagellates
Gymnodinium helv.	0	16/07/2014	12	2.5	dinoflagellates
Gymnodinium lantzschii	0	16/07/2014	12	2.5	dinoflagellates
Gymnodinium sp.	0	16/07/2014	12	2.5	dinoflagellates
Peridinium aciculiferum	42	16/07/2014	12	2.5	dinoflagellates
Peridinium cinctum	0	16/07/2014	12	2.5	dinoflagellates
Peridinium willei	0	16/07/2014	12	2.5	dinoflagellates
Sonstige Dinocysten	0	16/07/2014	12	2.5	dinoflagellates
Euglena sp.	0	16/07/2014	12	2.5	euglenophytes
Ankyra ancora	0	16/07/2014	12	2.5	greens
Botryococcus braunii	0	16/07/2014	12	2.5	greens
Carteria sp. (Tetraselmis)	0	16/07/2014	12	2.5	greens
Chlamydomonas sp.	57.66666667	16/07/2014	12	2.5	greens
Chlorella sp.	0	16/07/2014	12	2.5	greens
Coelastrum microporum	0	16/07/2014	12	2.5	greens
Coelastrum reticulatum	0	16/07/2014	12	2.5	greens
Crucigenia sp.	0	16/07/2014	12	2.5	greens
Crucigenia tetrapedia	0	16/07/2014	12	2.5	greens
Div. Chloro 7 µ Ø	0	16/07/2014	12	2.5	greens
Elakatothrix gelatinosa	14	16/07/2014	12	2.5	greens
Eutetramorus sp.	0	16/07/2014	12	2.5	greens
Hormidium	112.3333333	16/07/2014	12	2.5	greens
Kirchneriella sp.	0	16/07/2014	12	2.5	greens
Lagerheimia sp.	115	16/07/2014	12	2.5	greens
Monoraphidium minutum	0	16/07/2014	12	2.5	greens
Monoraphidium sp.	0	16/07/2014	12	2.5	greens
Nephrocytium	115	16/07/2014	12	2.5	greens
Pediastrum boryanum	0	16/07/2014	12	2.5	greens
Pediastrum duplex	0	16/07/2014	12	2.5	greens
Phacotus sp.	168.6666667	16/07/2014	12	2.5	greens
Scenedesmus acuminatus	0	16/07/2014	12	2.5	greens
Scenedesmus armatus	0	16/07/2014	12	2.5	greens
Scenedesmus linearis	460	16/07/2014	12	2.5	greens
Tetraedron minimum	0	16/07/2014	12	2.5	greens
Bicosoeca sp.	0	16/07/2014	12	4	chrysophytes
Bitrichia chodatii	57.66666667	16/07/2014	12	4	chrysophytes
Chromulina sp.	0	16/07/2014	12	4	chrysophytes
Dinobryon bavaricum	0	16/07/2014	12	4	chrysophytes
Dinobryon divergens	14	16/07/2014	12	4	chrysophytes
Dinobryon soziale	0	16/07/2014	12	4	chrysophytes
Div. Chrysoflagellaten	0	16/07/2014	12	4	chrysophytes
Erkenia sp.	805	16/07/2014	12	4	chrysophytes
Kephyrion sp.	0	16/07/2014	12	4	chrysophytes
Mallomonas acaroides	0	16/07/2014	12	4	chrysophytes
Ochromonas sp.	0	16/07/2014	12	4	chrysophytes
Pseudopedinella erk.	0	16/07/2014	12	4	chrysophytes
Salpingoeca sp.	0	16/07/2014	12	4	chrysophytes
Chroomonas sp.	0	16/07/2014	12	4	cryptophytes
Cryptomonas sp.	154.6666667	16/07/2014	12	4	cryptophytes
Cyathomonas truncata	0	16/07/2014	12	4	cryptophytes
Div. Cryptophyceen	0	16/07/2014	12	4	cryptophytes
Katablephris sp.	0	16/07/2014	12	4	cryptophytes
Rhodomonas sp.	1897.666667	16/07/2014	12	4	cryptophytes
Anabena fl.-aq.	0	16/07/2014	12	4	cyanobacteria
Anabena solitaria	0	16/07/2014	12	4	cyanobacteria
Aphanizomenon fl.-aq.	0	16/07/2014	12	4	cyanobacteria
Aphanocapsa elachista	0	16/07/2014	12	4	cyanobacteria
Aphanothece sp.	0	16/07/2014	12	4	cyanobacteria
Chroococcus sp.	28	16/07/2014	12	4	cyanobacteria
Coelosphaerium sp.	0	16/07/2014	12	4	cyanobacteria
Leptothrix echinata	0	16/07/2014	12	4	cyanobacteria
Microcystis aerug.	0	16/07/2014	12	4	cyanobacteria
Microcystis sp.	0	16/07/2014	12	4	cyanobacteria
Pseudoanabena sp.	0	16/07/2014	12	4	cyanobacteria
Spirulina sp.	0	16/07/2014	12	4	cyanobacteria
Synechococcus	345	16/07/2014	12	4	cyanobacteria
Woronichinia aponina	0	16/07/2014	12	4	cyanobacteria
Woronichinia naeg.	0	16/07/2014	12	4	cyanobacteria
Closterium ac. var. variab.	0	16/07/2014	12	4	desmids
Closterium acutum	0	16/07/2014	12	4	desmids
Closterium pronum	0	16/07/2014	12	4	desmids
Closterium sp.	0	16/07/2014	12	4	desmids
Cosmarium depr. plankt.	0	16/07/2014	12	4	desmids
Cosmarium sp.	0	16/07/2014	12	4	desmids
Mougeotia sp.	0	16/07/2014	12	4	desmids
Staurastrum sp.	0	16/07/2014	12	4	desmids
Achnanthes sp.	0	16/07/2014	12	4	diatoms
Asterionella formosa	56.33333333	16/07/2014	12	4	diatoms
Cocconeis sp.	0	16/07/2014	12	4	diatoms
Cyclotella comta	14	16/07/2014	12	4	diatoms
Cyclotella klein bis 7µ Ø	115	16/07/2014	12	4	diatoms
Cyclotella sp.	0	16/07/2014	12	4	diatoms
Cymbella sp.	0	16/07/2014	12	4	diatoms
Diatoma sp.	0	16/07/2014	12	4	diatoms
Fragilaria capucina	0	16/07/2014	12	4	diatoms
Fragilaria crotonensis	0	16/07/2014	12	4	diatoms
Melosira sp.	0	16/07/2014	12	4	diatoms
Navicula sp.	0	16/07/2014	12	4	diatoms
Nitzschia acicularis	0	16/07/2014	12	4	diatoms
Nitzschia sp.	0	16/07/2014	12	4	diatoms
Stephanodiscus klein bis 7µ Ø	115	16/07/2014	12	4	diatoms
Stephanodiscus sp.	0	16/07/2014	12	4	diatoms
Synedra acus	0	16/07/2014	12	4	diatoms
Synedra acus ang.	0	16/07/2014	12	4	diatoms
Synedra cyclopum	0	16/07/2014	12	4	diatoms
Ceratium hirundinella	0	16/07/2014	12	4	dinoflagellates
Cysten von Ceratium	0	16/07/2014	12	4	dinoflagellates
Gymnodinium helv.	0	16/07/2014	12	4	dinoflagellates
Gymnodinium lantzschii	14	16/07/2014	12	4	dinoflagellates
Gymnodinium sp.	0	16/07/2014	12	4	dinoflagellates
Peridinium aciculiferum	0	16/07/2014	12	4	dinoflagellates
Peridinium cinctum	0	16/07/2014	12	4	dinoflagellates
Peridinium willei	0	16/07/2014	12	4	dinoflagellates
Sonstige Dinocysten	0	16/07/2014	12	4	dinoflagellates
Euglena sp.	0	16/07/2014	12	4	euglenophytes
Ankyra ancora	0	16/07/2014	12	4	greens
Botryococcus braunii	0	16/07/2014	12	4	greens
Carteria sp. (Tetraselmis)	0	16/07/2014	12	4	greens
Chlamydomonas sp.	57.66666667	16/07/2014	12	4	greens
Chlorella sp.	0	16/07/2014	12	4	greens
Coelastrum microporum	0	16/07/2014	12	4	greens
Coelastrum reticulatum	0	16/07/2014	12	4	greens
Crucigenia sp.	0	16/07/2014	12	4	greens
Crucigenia tetrapedia	0	16/07/2014	12	4	greens
Div. Chloro 7 µ Ø	0	16/07/2014	12	4	greens
Elakatothrix gelatinosa	0	16/07/2014	12	4	greens
Eutetramorus sp.	0	16/07/2014	12	4	greens
Hormidium	0	16/07/2014	12	4	greens
Kirchneriella sp.	0	16/07/2014	12	4	greens
Lagerheimia sp.	230	16/07/2014	12	4	greens
Monoraphidium minutum	0	16/07/2014	12	4	greens
Monoraphidium sp.	0	16/07/2014	12	4	greens
Nephrocytium	0	16/07/2014	12	4	greens
Pediastrum boryanum	0	16/07/2014	12	4	greens
Pediastrum duplex	0	16/07/2014	12	4	greens
Phacotus sp.	112.3333333	16/07/2014	12	4	greens
Scenedesmus acuminatus	0	16/07/2014	12	4	greens
Scenedesmus armatus	0	16/07/2014	12	4	greens
Scenedesmus linearis	460	16/07/2014	12	4	greens
Tetraedron minimum	0	16/07/2014	12	4	greens
Bicosoeca sp.	0	16/07/2014	12	5.5	chrysophytes
Bitrichia chodatii	57.66666667	16/07/2014	12	5.5	chrysophytes
Chromulina sp.	0	16/07/2014	12	5.5	chrysophytes
Dinobryon bavaricum	0	16/07/2014	12	5.5	chrysophytes
Dinobryon divergens	84.33333333	16/07/2014	12	5.5	chrysophytes
Dinobryon soziale	0	16/07/2014	12	5.5	chrysophytes
Div. Chrysoflagellaten	0	16/07/2014	12	5.5	chrysophytes
Erkenia sp.	1322.666667	16/07/2014	12	5.5	chrysophytes
Kephyrion sp.	0	16/07/2014	12	5.5	chrysophytes
Mallomonas acaroides	14	16/07/2014	12	5.5	chrysophytes
Ochromonas sp.	57.66666667	16/07/2014	12	5.5	chrysophytes
Pseudopedinella erk.	0	16/07/2014	12	5.5	chrysophytes
Salpingoeca sp.	115	16/07/2014	12	5.5	chrysophytes
Chroomonas sp.	0	16/07/2014	12	5.5	cryptophytes
Cryptomonas sp.	84.33333333	16/07/2014	12	5.5	cryptophytes
Cyathomonas truncata	0	16/07/2014	12	5.5	cryptophytes
Div. Cryptophyceen	0	16/07/2014	12	5.5	cryptophytes
Katablephris sp.	57.66666667	16/07/2014	12	5.5	cryptophytes
Rhodomonas sp.	2127.666667	16/07/2014	12	5.5	cryptophytes
Anabena fl.-aq.	0	16/07/2014	12	5.5	cyanobacteria
Anabena solitaria	0	16/07/2014	12	5.5	cyanobacteria
Aphanizomenon fl.-aq.	0	16/07/2014	12	5.5	cyanobacteria
Aphanocapsa elachista	0	16/07/2014	12	5.5	cyanobacteria
Aphanothece sp.	0	16/07/2014	12	5.5	cyanobacteria
Chroococcus sp.	0	16/07/2014	12	5.5	cyanobacteria
Coelosphaerium sp.	0	16/07/2014	12	5.5	cyanobacteria
Leptothrix echinata	0	16/07/2014	12	5.5	cyanobacteria
Microcystis aerug.	0	16/07/2014	12	5.5	cyanobacteria
Microcystis sp.	0	16/07/2014	12	5.5	cyanobacteria
Pseudoanabena sp.	0	16/07/2014	12	5.5	cyanobacteria
Spirulina sp.	0	16/07/2014	12	5.5	cyanobacteria
Synechococcus	517.6666667	16/07/2014	12	5.5	cyanobacteria
Woronichinia aponina	0	16/07/2014	12	5.5	cyanobacteria
Woronichinia naeg.	0	16/07/2014	12	5.5	cyanobacteria
Closterium ac. var. variab.	0	16/07/2014	12	5.5	desmids
Closterium acutum	0	16/07/2014	12	5.5	desmids
Closterium pronum	0	16/07/2014	12	5.5	desmids
Closterium sp.	0	16/07/2014	12	5.5	desmids
Cosmarium depr. plankt.	0	16/07/2014	12	5.5	desmids
Cosmarium sp.	0	16/07/2014	12	5.5	desmids
Mougeotia sp.	0	16/07/2014	12	5.5	desmids
Staurastrum sp.	0	16/07/2014	12	5.5	desmids
Achnanthes sp.	0	16/07/2014	12	5.5	diatoms
Asterionella formosa	267	16/07/2014	12	5.5	diatoms
Cocconeis sp.	0	16/07/2014	12	5.5	diatoms
Cyclotella comta	14	16/07/2014	12	5.5	diatoms
Cyclotella klein bis 7µ Ø	172.6666667	16/07/2014	12	5.5	diatoms
Cyclotella sp.	0	16/07/2014	12	5.5	diatoms
Cymbella sp.	0	16/07/2014	12	5.5	diatoms
Diatoma sp.	0	16/07/2014	12	5.5	diatoms
Fragilaria capucina	0	16/07/2014	12	5.5	diatoms
Fragilaria crotonensis	42	16/07/2014	12	5.5	diatoms
Melosira sp.	0	16/07/2014	12	5.5	diatoms
Navicula sp.	0	16/07/2014	12	5.5	diatoms
Nitzschia acicularis	0	16/07/2014	12	5.5	diatoms
Nitzschia sp.	0	16/07/2014	12	5.5	diatoms
Stephanodiscus klein bis 7µ Ø	0	16/07/2014	12	5.5	diatoms
Stephanodiscus sp.	0	16/07/2014	12	5.5	diatoms
Synedra acus	0	16/07/2014	12	5.5	diatoms
Synedra acus ang.	0	16/07/2014	12	5.5	diatoms
Synedra cyclopum	0	16/07/2014	12	5.5	diatoms
Ceratium hirundinella	0	16/07/2014	12	5.5	dinoflagellates
Cysten von Ceratium	0	16/07/2014	12	5.5	dinoflagellates
Gymnodinium helv.	0	16/07/2014	12	5.5	dinoflagellates
Gymnodinium lantzschii	0	16/07/2014	12	5.5	dinoflagellates
Gymnodinium sp.	0	16/07/2014	12	5.5	dinoflagellates
Peridinium aciculiferum	0	16/07/2014	12	5.5	dinoflagellates
Peridinium cinctum	0	16/07/2014	12	5.5	dinoflagellates
Peridinium willei	0	16/07/2014	12	5.5	dinoflagellates
Sonstige Dinocysten	0	16/07/2014	12	5.5	dinoflagellates
Euglena sp.	0	16/07/2014	12	5.5	euglenophytes
Ankyra ancora	0	16/07/2014	12	5.5	greens
Botryococcus braunii	0	16/07/2014	12	5.5	greens
Carteria sp. (Tetraselmis)	0	16/07/2014	12	5.5	greens
Chlamydomonas sp.	115	16/07/2014	12	5.5	greens
Chlorella sp.	0	16/07/2014	12	5.5	greens
Coelastrum microporum	0	16/07/2014	12	5.5	greens
Coelastrum reticulatum	0	16/07/2014	12	5.5	greens
Crucigenia sp.	0	16/07/2014	12	5.5	greens
Crucigenia tetrapedia	230	16/07/2014	12	5.5	greens
Div. Chloro 7 µ Ø	0	16/07/2014	12	5.5	greens
Elakatothrix gelatinosa	0	16/07/2014	12	5.5	greens
Eutetramorus sp.	0	16/07/2014	12	5.5	greens
Hormidium	534	16/07/2014	12	5.5	greens
Kirchneriella sp.	0	16/07/2014	12	5.5	greens
Lagerheimia sp.	115	16/07/2014	12	5.5	greens
Monoraphidium minutum	0	16/07/2014	12	5.5	greens
Monoraphidium sp.	0	16/07/2014	12	5.5	greens
Nephrocytium	57.66666667	16/07/2014	12	5.5	greens
Pediastrum boryanum	0	16/07/2014	12	5.5	greens
Pediastrum duplex	0	16/07/2014	12	5.5	greens
Phacotus sp.	126.3333333	16/07/2014	12	5.5	greens
Scenedesmus acuminatus	0	16/07/2014	12	5.5	greens
Scenedesmus armatus	0	16/07/2014	12	5.5	greens
Scenedesmus linearis	0	16/07/2014	12	5.5	greens
Tetraedron minimum	0	16/07/2014	12	5.5	greens
Bicosoeca sp.	0	16/07/2014	12	7	chrysophytes
Bitrichia chodatii	0	16/07/2014	12	7	chrysophytes
Chromulina sp.	0	16/07/2014	12	7	chrysophytes
Dinobryon bavaricum	0	16/07/2014	12	7	chrysophytes
Dinobryon divergens	70.33333333	16/07/2014	12	7	chrysophytes
Dinobryon soziale	0	16/07/2014	12	7	chrysophytes
Div. Chrysoflagellaten	0	16/07/2014	12	7	chrysophytes
Erkenia sp.	460	16/07/2014	12	7	chrysophytes
Kephyrion sp.	0	16/07/2014	12	7	chrysophytes
Mallomonas acaroides	0	16/07/2014	12	7	chrysophytes
Ochromonas sp.	0	16/07/2014	12	7	chrysophytes
Pseudopedinella erk.	0	16/07/2014	12	7	chrysophytes
Salpingoeca sp.	57.66666667	16/07/2014	12	7	chrysophytes
Chroomonas sp.	0	16/07/2014	12	7	cryptophytes
Cryptomonas sp.	70.33333333	16/07/2014	12	7	cryptophytes
Cyathomonas truncata	0	16/07/2014	12	7	cryptophytes
Div. Cryptophyceen	0	16/07/2014	12	7	cryptophytes
Katablephris sp.	0	16/07/2014	12	7	cryptophytes
Rhodomonas sp.	690	16/07/2014	12	7	cryptophytes
Anabena fl.-aq.	0	16/07/2014	12	7	cyanobacteria
Anabena solitaria	0	16/07/2014	12	7	cyanobacteria
Aphanizomenon fl.-aq.	0	16/07/2014	12	7	cyanobacteria
Aphanocapsa elachista	0	16/07/2014	12	7	cyanobacteria
Aphanothece sp.	0	16/07/2014	12	7	cyanobacteria
Chroococcus sp.	0	16/07/2014	12	7	cyanobacteria
Coelosphaerium sp.	0	16/07/2014	12	7	cyanobacteria
Leptothrix echinata	0	16/07/2014	12	7	cyanobacteria
Microcystis aerug.	0	16/07/2014	12	7	cyanobacteria
Microcystis sp.	0	16/07/2014	12	7	cyanobacteria
Pseudoanabena sp.	0	16/07/2014	12	7	cyanobacteria
Spirulina sp.	0	16/07/2014	12	7	cyanobacteria
Synechococcus	575	16/07/2014	12	7	cyanobacteria
Woronichinia aponina	0	16/07/2014	12	7	cyanobacteria
Woronichinia naeg.	0	16/07/2014	12	7	cyanobacteria
Closterium ac. var. variab.	14	16/07/2014	12	7	desmids
Closterium acutum	0	16/07/2014	12	7	desmids
Closterium pronum	0	16/07/2014	12	7	desmids
Closterium sp.	0	16/07/2014	12	7	desmids
Cosmarium depr. plankt.	0	16/07/2014	12	7	desmids
Cosmarium sp.	0	16/07/2014	12	7	desmids
Mougeotia sp.	0	16/07/2014	12	7	desmids
Staurastrum sp.	0	16/07/2014	12	7	desmids
Achnanthes sp.	0	16/07/2014	12	7	diatoms
Asterionella formosa	112.3333333	16/07/2014	12	7	diatoms
Cocconeis sp.	0	16/07/2014	12	7	diatoms
Cyclotella comta	0	16/07/2014	12	7	diatoms
Cyclotella klein bis 7µ Ø	57.66666667	16/07/2014	12	7	diatoms
Cyclotella sp.	0	16/07/2014	12	7	diatoms
Cymbella sp.	0	16/07/2014	12	7	diatoms
Diatoma sp.	0	16/07/2014	12	7	diatoms
Fragilaria capucina	0	16/07/2014	12	7	diatoms
Fragilaria crotonensis	0	16/07/2014	12	7	diatoms
Melosira sp.	0	16/07/2014	12	7	diatoms
Navicula sp.	0	16/07/2014	12	7	diatoms
Nitzschia acicularis	0	16/07/2014	12	7	diatoms
Nitzschia sp.	0	16/07/2014	12	7	diatoms
Stephanodiscus klein bis 7µ Ø	115	16/07/2014	12	7	diatoms
Stephanodiscus sp.	0	16/07/2014	12	7	diatoms
Synedra acus	0	16/07/2014	12	7	diatoms
Synedra acus ang.	0	16/07/2014	12	7	diatoms
Synedra cyclopum	0	16/07/2014	12	7	diatoms
Ceratium hirundinella	0	16/07/2014	12	7	dinoflagellates
Cysten von Ceratium	0	16/07/2014	12	7	dinoflagellates
Gymnodinium helv.	0	16/07/2014	12	7	dinoflagellates
Gymnodinium lantzschii	0	16/07/2014	12	7	dinoflagellates
Gymnodinium sp.	0	16/07/2014	12	7	dinoflagellates
Peridinium aciculiferum	0	16/07/2014	12	7	dinoflagellates
Peridinium cinctum	0	16/07/2014	12	7	dinoflagellates
Peridinium willei	0	16/07/2014	12	7	dinoflagellates
Sonstige Dinocysten	0	16/07/2014	12	7	dinoflagellates
Euglena sp.	0	16/07/2014	12	7	euglenophytes
Ankyra ancora	14	16/07/2014	12	7	greens
Botryococcus braunii	0	16/07/2014	12	7	greens
Carteria sp. (Tetraselmis)	0	16/07/2014	12	7	greens
Chlamydomonas sp.	0	16/07/2014	12	7	greens
Chlorella sp.	0	16/07/2014	12	7	greens
Coelastrum microporum	0	16/07/2014	12	7	greens
Coelastrum reticulatum	0	16/07/2014	12	7	greens
Crucigenia sp.	0	16/07/2014	12	7	greens
Crucigenia tetrapedia	0	16/07/2014	12	7	greens
Div. Chloro 7 µ Ø	0	16/07/2014	12	7	greens
Elakatothrix gelatinosa	0	16/07/2014	12	7	greens
Eutetramorus sp.	0	16/07/2014	12	7	greens
Hormidium	0	16/07/2014	12	7	greens
Kirchneriella sp.	0	16/07/2014	12	7	greens
Lagerheimia sp.	57.66666667	16/07/2014	12	7	greens
Monoraphidium minutum	0	16/07/2014	12	7	greens
Monoraphidium sp.	0	16/07/2014	12	7	greens
Nephrocytium	0	16/07/2014	12	7	greens
Pediastrum boryanum	0	16/07/2014	12	7	greens
Pediastrum duplex	0	16/07/2014	12	7	greens
Phacotus sp.	98.33333333	16/07/2014	12	7	greens
Scenedesmus acuminatus	0	16/07/2014	12	7	greens
Scenedesmus armatus	0	16/07/2014	12	7	greens
Scenedesmus linearis	460	16/07/2014	12	7	greens
Tetraedron minimum	0	16/07/2014	12	7	greens
Bicosoeca sp.	0	16/07/2014	12	8.5	chrysophytes
Bitrichia chodatii	0	16/07/2014	12	8.5	chrysophytes
Chromulina sp.	0	16/07/2014	12	8.5	chrysophytes
Dinobryon bavaricum	0	16/07/2014	12	8.5	chrysophytes
Dinobryon divergens	14	16/07/2014	12	8.5	chrysophytes
Dinobryon soziale	0	16/07/2014	12	8.5	chrysophytes
Div. Chrysoflagellaten	0	16/07/2014	12	8.5	chrysophytes
Erkenia sp.	115	16/07/2014	12	8.5	chrysophytes
Kephyrion sp.	57.66666667	16/07/2014	12	8.5	chrysophytes
Mallomonas acaroides	0	16/07/2014	12	8.5	chrysophytes
Ochromonas sp.	0	16/07/2014	12	8.5	chrysophytes
Pseudopedinella erk.	0	16/07/2014	12	8.5	chrysophytes
Salpingoeca sp.	0	16/07/2014	12	8.5	chrysophytes
Chroomonas sp.	0	16/07/2014	12	8.5	cryptophytes
Cryptomonas sp.	42	16/07/2014	12	8.5	cryptophytes
Cyathomonas truncata	0	16/07/2014	12	8.5	cryptophytes
Div. Cryptophyceen	0	16/07/2014	12	8.5	cryptophytes
Katablephris sp.	0	16/07/2014	12	8.5	cryptophytes
Rhodomonas sp.	460	16/07/2014	12	8.5	cryptophytes
Anabena fl.-aq.	0	16/07/2014	12	8.5	cyanobacteria
Anabena solitaria	0	16/07/2014	12	8.5	cyanobacteria
Aphanizomenon fl.-aq.	0	16/07/2014	12	8.5	cyanobacteria
Aphanocapsa elachista	0	16/07/2014	12	8.5	cyanobacteria
Aphanothece sp.	0	16/07/2014	12	8.5	cyanobacteria
Chroococcus sp.	0	16/07/2014	12	8.5	cyanobacteria
Coelosphaerium sp.	0	16/07/2014	12	8.5	cyanobacteria
Leptothrix echinata	0	16/07/2014	12	8.5	cyanobacteria
Microcystis aerug.	0	16/07/2014	12	8.5	cyanobacteria
Microcystis sp.	0	16/07/2014	12	8.5	cyanobacteria
Pseudoanabena sp.	0	16/07/2014	12	8.5	cyanobacteria
Spirulina sp.	0	16/07/2014	12	8.5	cyanobacteria
Synechococcus	57.66666667	16/07/2014	12	8.5	cyanobacteria
Woronichinia aponina	0	16/07/2014	12	8.5	cyanobacteria
Woronichinia naeg.	0	16/07/2014	12	8.5	cyanobacteria
Closterium ac. var. variab.	0	16/07/2014	12	8.5	desmids
Closterium acutum	0	16/07/2014	12	8.5	desmids
Closterium pronum	0	16/07/2014	12	8.5	desmids
Closterium sp.	0	16/07/2014	12	8.5	desmids
Cosmarium depr. plankt.	0	16/07/2014	12	8.5	desmids
Cosmarium sp.	0	16/07/2014	12	8.5	desmids
Mougeotia sp.	0	16/07/2014	12	8.5	desmids
Staurastrum sp.	0	16/07/2014	12	8.5	desmids
Achnanthes sp.	0	16/07/2014	12	8.5	diatoms
Asterionella formosa	0	16/07/2014	12	8.5	diatoms
Cocconeis sp.	0	16/07/2014	12	8.5	diatoms
Cyclotella comta	0	16/07/2014	12	8.5	diatoms
Cyclotella klein bis 7µ Ø	0	16/07/2014	12	8.5	diatoms
Cyclotella sp.	0	16/07/2014	12	8.5	diatoms
Cymbella sp.	0	16/07/2014	12	8.5	diatoms
Diatoma sp.	0	16/07/2014	12	8.5	diatoms
Fragilaria capucina	0	16/07/2014	12	8.5	diatoms
Fragilaria crotonensis	0	16/07/2014	12	8.5	diatoms
Melosira sp.	0	16/07/2014	12	8.5	diatoms
Navicula sp.	0	16/07/2014	12	8.5	diatoms
Nitzschia acicularis	0	16/07/2014	12	8.5	diatoms
Nitzschia sp.	0	16/07/2014	12	8.5	diatoms
Stephanodiscus klein bis 7µ Ø	115	16/07/2014	12	8.5	diatoms
Stephanodiscus sp.	0	16/07/2014	12	8.5	diatoms
Synedra acus	0	16/07/2014	12	8.5	diatoms
Synedra acus ang.	0	16/07/2014	12	8.5	diatoms
Synedra cyclopum	0	16/07/2014	12	8.5	diatoms
Ceratium hirundinella	0	16/07/2014	12	8.5	dinoflagellates
Cysten von Ceratium	0	16/07/2014	12	8.5	dinoflagellates
Gymnodinium helv.	0	16/07/2014	12	8.5	dinoflagellates
Gymnodinium lantzschii	0	16/07/2014	12	8.5	dinoflagellates
Gymnodinium sp.	0	16/07/2014	12	8.5	dinoflagellates
Peridinium aciculiferum	0	16/07/2014	12	8.5	dinoflagellates
Peridinium cinctum	0	16/07/2014	12	8.5	dinoflagellates
Peridinium willei	0	16/07/2014	12	8.5	dinoflagellates
Sonstige Dinocysten	0	16/07/2014	12	8.5	dinoflagellates
Euglena sp.	0	16/07/2014	12	8.5	euglenophytes
Ankyra ancora	0	16/07/2014	12	8.5	greens
Botryococcus braunii	0	16/07/2014	12	8.5	greens
Carteria sp. (Tetraselmis)	0	16/07/2014	12	8.5	greens
Chlamydomonas sp.	0	16/07/2014	12	8.5	greens
Chlorella sp.	0	16/07/2014	12	8.5	greens
Coelastrum microporum	0	16/07/2014	12	8.5	greens
Coelastrum reticulatum	0	16/07/2014	12	8.5	greens
Crucigenia sp.	0	16/07/2014	12	8.5	greens
Crucigenia tetrapedia	0	16/07/2014	12	8.5	greens
Div. Chloro 7 µ Ø	0	16/07/2014	12	8.5	greens
Elakatothrix gelatinosa	0	16/07/2014	12	8.5	greens
Eutetramorus sp.	0	16/07/2014	12	8.5	greens
Hormidium	56.33333333	16/07/2014	12	8.5	greens
Kirchneriella sp.	0	16/07/2014	12	8.5	greens
Lagerheimia sp.	172.6666667	16/07/2014	12	8.5	greens
Monoraphidium minutum	0	16/07/2014	12	8.5	greens
Monoraphidium sp.	0	16/07/2014	12	8.5	greens
Nephrocytium	0	16/07/2014	12	8.5	greens
Pediastrum boryanum	0	16/07/2014	12	8.5	greens
Pediastrum duplex	0	16/07/2014	12	8.5	greens
Phacotus sp.	56.33333333	16/07/2014	12	8.5	greens
Scenedesmus acuminatus	0	16/07/2014	12	8.5	greens
Scenedesmus armatus	0	16/07/2014	12	8.5	greens
Scenedesmus linearis	0	16/07/2014	12	8.5	greens
Tetraedron minimum	0	16/07/2014	12	8.5	greens
Bicosoeca sp.	0	23/07/2014	12	1	chrysophytes
Bitrichia chodatii	57.66666667	23/07/2014	12	1	chrysophytes
Chromulina sp.	0	23/07/2014	12	1	chrysophytes
Dinobryon bavaricum	0	23/07/2014	12	1	chrysophytes
Dinobryon divergens	168.6666667	23/07/2014	12	1	chrysophytes
Dinobryon soziale	0	23/07/2014	12	1	chrysophytes
Div. Chrysoflagellaten	0	23/07/2014	12	1	chrysophytes
Erkenia sp.	747.6666667	23/07/2014	12	1	chrysophytes
Kephyrion sp.	0	23/07/2014	12	1	chrysophytes
Mallomonas acaroides	0	23/07/2014	12	1	chrysophytes
Ochromonas sp.	0	23/07/2014	12	1	chrysophytes
Pseudopedinella erk.	0	23/07/2014	12	1	chrysophytes
Salpingoeca sp.	0	23/07/2014	12	1	chrysophytes
Chroomonas sp.	0	23/07/2014	12	1	cryptophytes
Cryptomonas sp.	435.6666667	23/07/2014	12	1	cryptophytes
Cyathomonas truncata	0	23/07/2014	12	1	cryptophytes
Div. Cryptophyceen	0	23/07/2014	12	1	cryptophytes
Katablephris sp.	0	23/07/2014	12	1	cryptophytes
Rhodomonas sp.	805	23/07/2014	12	1	cryptophytes
Anabena fl.-aq.	0	23/07/2014	12	1	cyanobacteria
Anabena solitaria	0	23/07/2014	12	1	cyanobacteria
Aphanizomenon fl.-aq.	281	23/07/2014	12	1	cyanobacteria
Aphanocapsa elachista	0	23/07/2014	12	1	cyanobacteria
Aphanothece sp.	0	23/07/2014	12	1	cyanobacteria
Chroococcus sp.	56.33333333	23/07/2014	12	1	cyanobacteria
Coelosphaerium sp.	0	23/07/2014	12	1	cyanobacteria
Leptothrix echinata	0	23/07/2014	12	1	cyanobacteria
Microcystis aerug.	0	23/07/2014	12	1	cyanobacteria
Microcystis sp.	0	23/07/2014	12	1	cyanobacteria
Pseudoanabena sp.	0	23/07/2014	12	1	cyanobacteria
Spirulina sp.	0	23/07/2014	12	1	cyanobacteria
Synechococcus	920	23/07/2014	12	1	cyanobacteria
Woronichinia aponina	0	23/07/2014	12	1	cyanobacteria
Woronichinia naeg.	0	23/07/2014	12	1	cyanobacteria
Closterium ac. var. variab.	0	23/07/2014	12	1	desmids
Closterium acutum	0	23/07/2014	12	1	desmids
Closterium pronum	0	23/07/2014	12	1	desmids
Closterium sp.	0	23/07/2014	12	1	desmids
Cosmarium depr. plankt.	14	23/07/2014	12	1	desmids
Cosmarium sp.	0	23/07/2014	12	1	desmids
Mougeotia sp.	0	23/07/2014	12	1	desmids
Staurastrum sp.	0	23/07/2014	12	1	desmids
Achnanthes sp.	0	23/07/2014	12	1	diatoms
Asterionella formosa	154.6666667	23/07/2014	12	1	diatoms
Cocconeis sp.	0	23/07/2014	12	1	diatoms
Cyclotella comta	14	23/07/2014	12	1	diatoms
Cyclotella klein bis 7µ Ø	0	23/07/2014	12	1	diatoms
Cyclotella sp.	0	23/07/2014	12	1	diatoms
Cymbella sp.	0	23/07/2014	12	1	diatoms
Diatoma sp.	0	23/07/2014	12	1	diatoms
Fragilaria capucina	0	23/07/2014	12	1	diatoms
Fragilaria crotonensis	0	23/07/2014	12	1	diatoms
Melosira sp.	0	23/07/2014	12	1	diatoms
Navicula sp.	0	23/07/2014	12	1	diatoms
Nitzschia acicularis	0	23/07/2014	12	1	diatoms
Nitzschia sp.	0	23/07/2014	12	1	diatoms
Stephanodiscus klein bis 7µ Ø	57.66666667	23/07/2014	12	1	diatoms
Stephanodiscus sp.	0	23/07/2014	12	1	diatoms
Synedra acus	0	23/07/2014	12	1	diatoms
Synedra acus ang.	0	23/07/2014	12	1	diatoms
Synedra cyclopum	42	23/07/2014	12	1	diatoms
Ceratium hirundinella	0	23/07/2014	12	1	dinoflagellates
Cysten von Ceratium	0	23/07/2014	12	1	dinoflagellates
Gymnodinium helv.	0	23/07/2014	12	1	dinoflagellates
Gymnodinium lantzschii	0	23/07/2014	12	1	dinoflagellates
Gymnodinium sp.	0	23/07/2014	12	1	dinoflagellates
Peridinium aciculiferum	70.33333333	23/07/2014	12	1	dinoflagellates
Peridinium cinctum	0	23/07/2014	12	1	dinoflagellates
Peridinium willei	14	23/07/2014	12	1	dinoflagellates
Sonstige Dinocysten	0	23/07/2014	12	1	dinoflagellates
Euglena sp.	0	23/07/2014	12	1	euglenophytes
Ankyra ancora	14	23/07/2014	12	1	greens
Botryococcus braunii	0	23/07/2014	12	1	greens
Carteria sp. (Tetraselmis)	0	23/07/2014	12	1	greens
Chlamydomonas sp.	57.66666667	23/07/2014	12	1	greens
Chlorella sp.	0	23/07/2014	12	1	greens
Coelastrum microporum	0	23/07/2014	12	1	greens
Coelastrum reticulatum	0	23/07/2014	12	1	greens
Crucigenia sp.	0	23/07/2014	12	1	greens
Crucigenia tetrapedia	0	23/07/2014	12	1	greens
Div. Chloro 7 µ Ø	0	23/07/2014	12	1	greens
Elakatothrix gelatinosa	14	23/07/2014	12	1	greens
Eutetramorus sp.	0	23/07/2014	12	1	greens
Hormidium	0	23/07/2014	12	1	greens
Kirchneriella sp.	0	23/07/2014	12	1	greens
Lagerheimia sp.	115	23/07/2014	12	1	greens
Monoraphidium minutum	0	23/07/2014	12	1	greens
Monoraphidium sp.	0	23/07/2014	12	1	greens
Nephrocytium	57.66666667	23/07/2014	12	1	greens
Pediastrum boryanum	0	23/07/2014	12	1	greens
Pediastrum duplex	0	23/07/2014	12	1	greens
Phacotus sp.	0	23/07/2014	12	1	greens
Scenedesmus acuminatus	0	23/07/2014	12	1	greens
Scenedesmus armatus	230	23/07/2014	12	1	greens
Scenedesmus linearis	0	23/07/2014	12	1	greens
Tetraedron minimum	0	23/07/2014	12	1	greens
Bicosoeca sp.	0	23/07/2014	12	2.5	chrysophytes
Bitrichia chodatii	0	23/07/2014	12	2.5	chrysophytes
Chromulina sp.	57.66666667	23/07/2014	12	2.5	chrysophytes
Dinobryon bavaricum	0	23/07/2014	12	2.5	chrysophytes
Dinobryon divergens	56.33333333	23/07/2014	12	2.5	chrysophytes
Dinobryon soziale	0	23/07/2014	12	2.5	chrysophytes
Div. Chrysoflagellaten	0	23/07/2014	12	2.5	chrysophytes
Erkenia sp.	402.6666667	23/07/2014	12	2.5	chrysophytes
Kephyrion sp.	0	23/07/2014	12	2.5	chrysophytes
Mallomonas acaroides	0	23/07/2014	12	2.5	chrysophytes
Ochromonas sp.	0	23/07/2014	12	2.5	chrysophytes
Pseudopedinella erk.	0	23/07/2014	12	2.5	chrysophytes
Salpingoeca sp.	0	23/07/2014	12	2.5	chrysophytes
Chroomonas sp.	0	23/07/2014	12	2.5	cryptophytes
Cryptomonas sp.	140.6666667	23/07/2014	12	2.5	cryptophytes
Cyathomonas truncata	0	23/07/2014	12	2.5	cryptophytes
Div. Cryptophyceen	0	23/07/2014	12	2.5	cryptophytes
Katablephris sp.	0	23/07/2014	12	2.5	cryptophytes
Rhodomonas sp.	402.6666667	23/07/2014	12	2.5	cryptophytes
Anabena fl.-aq.	0	23/07/2014	12	2.5	cyanobacteria
Anabena solitaria	0	23/07/2014	12	2.5	cyanobacteria
Aphanizomenon fl.-aq.	0	23/07/2014	12	2.5	cyanobacteria
Aphanocapsa elachista	0	23/07/2014	12	2.5	cyanobacteria
Aphanothece sp.	0	23/07/2014	12	2.5	cyanobacteria
Chroococcus sp.	28	23/07/2014	12	2.5	cyanobacteria
Coelosphaerium sp.	0	23/07/2014	12	2.5	cyanobacteria
Leptothrix echinata	0	23/07/2014	12	2.5	cyanobacteria
Microcystis aerug.	0	23/07/2014	12	2.5	cyanobacteria
Microcystis sp.	0	23/07/2014	12	2.5	cyanobacteria
Pseudoanabena sp.	0	23/07/2014	12	2.5	cyanobacteria
Spirulina sp.	0	23/07/2014	12	2.5	cyanobacteria
Synechococcus	517.6666667	23/07/2014	12	2.5	cyanobacteria
Woronichinia aponina	0	23/07/2014	12	2.5	cyanobacteria
Woronichinia naeg.	0	23/07/2014	12	2.5	cyanobacteria
Closterium ac. var. variab.	0	23/07/2014	12	2.5	desmids
Closterium acutum	0	23/07/2014	12	2.5	desmids
Closterium pronum	0	23/07/2014	12	2.5	desmids
Closterium sp.	0	23/07/2014	12	2.5	desmids
Cosmarium depr. plankt.	0	23/07/2014	12	2.5	desmids
Cosmarium sp.	0	23/07/2014	12	2.5	desmids
Mougeotia sp.	0	23/07/2014	12	2.5	desmids
Staurastrum sp.	0	23/07/2014	12	2.5	desmids
Achnanthes sp.	0	23/07/2014	12	2.5	diatoms
Asterionella formosa	14	23/07/2014	12	2.5	diatoms
Cocconeis sp.	0	23/07/2014	12	2.5	diatoms
Cyclotella comta	98.33333333	23/07/2014	12	2.5	diatoms
Cyclotella klein bis 7µ Ø	57.66666667	23/07/2014	12	2.5	diatoms
Cyclotella sp.	0	23/07/2014	12	2.5	diatoms
Cymbella sp.	0	23/07/2014	12	2.5	diatoms
Diatoma sp.	0	23/07/2014	12	2.5	diatoms
Fragilaria capucina	0	23/07/2014	12	2.5	diatoms
Fragilaria crotonensis	0	23/07/2014	12	2.5	diatoms
Melosira sp.	0	23/07/2014	12	2.5	diatoms
Navicula sp.	0	23/07/2014	12	2.5	diatoms
Nitzschia acicularis	0	23/07/2014	12	2.5	diatoms
Nitzschia sp.	0	23/07/2014	12	2.5	diatoms
Stephanodiscus klein bis 7µ Ø	0	23/07/2014	12	2.5	diatoms
Stephanodiscus sp.	0	23/07/2014	12	2.5	diatoms
Synedra acus	0	23/07/2014	12	2.5	diatoms
Synedra acus ang.	0	23/07/2014	12	2.5	diatoms
Synedra cyclopum	0	23/07/2014	12	2.5	diatoms
Ceratium hirundinella	0	23/07/2014	12	2.5	dinoflagellates
Cysten von Ceratium	0	23/07/2014	12	2.5	dinoflagellates
Gymnodinium helv.	0	23/07/2014	12	2.5	dinoflagellates
Gymnodinium lantzschii	14	23/07/2014	12	2.5	dinoflagellates
Gymnodinium sp.	0	23/07/2014	12	2.5	dinoflagellates
Peridinium aciculiferum	28	23/07/2014	12	2.5	dinoflagellates
Peridinium cinctum	0	23/07/2014	12	2.5	dinoflagellates
Peridinium willei	0	23/07/2014	12	2.5	dinoflagellates
Sonstige Dinocysten	0	23/07/2014	12	2.5	dinoflagellates
Euglena sp.	0	23/07/2014	12	2.5	euglenophytes
Ankyra ancora	0	23/07/2014	12	2.5	greens
Botryococcus braunii	0	23/07/2014	12	2.5	greens
Carteria sp. (Tetraselmis)	0	23/07/2014	12	2.5	greens
Chlamydomonas sp.	0	23/07/2014	12	2.5	greens
Chlorella sp.	0	23/07/2014	12	2.5	greens
Coelastrum microporum	0	23/07/2014	12	2.5	greens
Coelastrum reticulatum	0	23/07/2014	12	2.5	greens
Crucigenia sp.	0	23/07/2014	12	2.5	greens
Crucigenia tetrapedia	0	23/07/2014	12	2.5	greens
Div. Chloro 7 µ Ø	0	23/07/2014	12	2.5	greens
Elakatothrix gelatinosa	0	23/07/2014	12	2.5	greens
Eutetramorus sp.	0	23/07/2014	12	2.5	greens
Hormidium	112.3333333	23/07/2014	12	2.5	greens
Kirchneriella sp.	0	23/07/2014	12	2.5	greens
Lagerheimia sp.	57.66666667	23/07/2014	12	2.5	greens
Monoraphidium minutum	0	23/07/2014	12	2.5	greens
Monoraphidium sp.	0	23/07/2014	12	2.5	greens
Nephrocytium	0	23/07/2014	12	2.5	greens
Pediastrum boryanum	0	23/07/2014	12	2.5	greens
Pediastrum duplex	0	23/07/2014	12	2.5	greens
Phacotus sp.	210.6666667	23/07/2014	12	2.5	greens
Scenedesmus acuminatus	0	23/07/2014	12	2.5	greens
Scenedesmus armatus	0	23/07/2014	12	2.5	greens
Scenedesmus linearis	0	23/07/2014	12	2.5	greens
Tetraedron minimum	0	23/07/2014	12	2.5	greens
Bicosoeca sp.	0	23/07/2014	12	4	chrysophytes
Bitrichia chodatii	0	23/07/2014	12	4	chrysophytes
Chromulina sp.	0	23/07/2014	12	4	chrysophytes
Dinobryon bavaricum	0	23/07/2014	12	4	chrysophytes
Dinobryon divergens	84.33333333	23/07/2014	12	4	chrysophytes
Dinobryon soziale	0	23/07/2014	12	4	chrysophytes
Div. Chrysoflagellaten	0	23/07/2014	12	4	chrysophytes
Erkenia sp.	287.6666667	23/07/2014	12	4	chrysophytes
Kephyrion sp.	0	23/07/2014	12	4	chrysophytes
Mallomonas acaroides	0	23/07/2014	12	4	chrysophytes
Ochromonas sp.	0	23/07/2014	12	4	chrysophytes
Pseudopedinella erk.	0	23/07/2014	12	4	chrysophytes
Salpingoeca sp.	115	23/07/2014	12	4	chrysophytes
Chroomonas sp.	0	23/07/2014	12	4	cryptophytes
Cryptomonas sp.	98.33333333	23/07/2014	12	4	cryptophytes
Cyathomonas truncata	0	23/07/2014	12	4	cryptophytes
Div. Cryptophyceen	0	23/07/2014	12	4	cryptophytes
Katablephris sp.	57.66666667	23/07/2014	12	4	cryptophytes
Rhodomonas sp.	345	23/07/2014	12	4	cryptophytes
Anabena fl.-aq.	0	23/07/2014	12	4	cyanobacteria
Anabena solitaria	0	23/07/2014	12	4	cyanobacteria
Aphanizomenon fl.-aq.	0	23/07/2014	12	4	cyanobacteria
Aphanocapsa elachista	0	23/07/2014	12	4	cyanobacteria
Aphanothece sp.	0	23/07/2014	12	4	cyanobacteria
Chroococcus sp.	28	23/07/2014	12	4	cyanobacteria
Coelosphaerium sp.	0	23/07/2014	12	4	cyanobacteria
Leptothrix echinata	0	23/07/2014	12	4	cyanobacteria
Microcystis aerug.	0	23/07/2014	12	4	cyanobacteria
Microcystis sp.	0	23/07/2014	12	4	cyanobacteria
Pseudoanabena sp.	0	23/07/2014	12	4	cyanobacteria
Spirulina sp.	0	23/07/2014	12	4	cyanobacteria
Synechococcus	747.6666667	23/07/2014	12	4	cyanobacteria
Woronichinia aponina	0	23/07/2014	12	4	cyanobacteria
Woronichinia naeg.	0	23/07/2014	12	4	cyanobacteria
Closterium ac. var. variab.	0	23/07/2014	12	4	desmids
Closterium acutum	0	23/07/2014	12	4	desmids
Closterium pronum	0	23/07/2014	12	4	desmids
Closterium sp.	0	23/07/2014	12	4	desmids
Cosmarium depr. plankt.	0	23/07/2014	12	4	desmids
Cosmarium sp.	0	23/07/2014	12	4	desmids
Mougeotia sp.	0	23/07/2014	12	4	desmids
Staurastrum sp.	0	23/07/2014	12	4	desmids
Achnanthes sp.	0	23/07/2014	12	4	diatoms
Asterionella formosa	351.3333333	23/07/2014	12	4	diatoms
Cocconeis sp.	0	23/07/2014	12	4	diatoms
Cyclotella comta	42	23/07/2014	12	4	diatoms
Cyclotella klein bis 7µ Ø	0	23/07/2014	12	4	diatoms
Cyclotella sp.	0	23/07/2014	12	4	diatoms
Cymbella sp.	0	23/07/2014	12	4	diatoms
Diatoma sp.	0	23/07/2014	12	4	diatoms
Fragilaria capucina	0	23/07/2014	12	4	diatoms
Fragilaria crotonensis	0	23/07/2014	12	4	diatoms
Melosira sp.	0	23/07/2014	12	4	diatoms
Navicula sp.	0	23/07/2014	12	4	diatoms
Nitzschia acicularis	0	23/07/2014	12	4	diatoms
Nitzschia sp.	0	23/07/2014	12	4	diatoms
Stephanodiscus klein bis 7µ Ø	0	23/07/2014	12	4	diatoms
Stephanodiscus sp.	0	23/07/2014	12	4	diatoms
Synedra acus	0	23/07/2014	12	4	diatoms
Synedra acus ang.	0	23/07/2014	12	4	diatoms
Synedra cyclopum	14	23/07/2014	12	4	diatoms
Ceratium hirundinella	0	23/07/2014	12	4	dinoflagellates
Cysten von Ceratium	0	23/07/2014	12	4	dinoflagellates
Gymnodinium helv.	0	23/07/2014	12	4	dinoflagellates
Gymnodinium lantzschii	0	23/07/2014	12	4	dinoflagellates
Gymnodinium sp.	0	23/07/2014	12	4	dinoflagellates
Peridinium aciculiferum	14	23/07/2014	12	4	dinoflagellates
Peridinium cinctum	0	23/07/2014	12	4	dinoflagellates
Peridinium willei	14	23/07/2014	12	4	dinoflagellates
Sonstige Dinocysten	0	23/07/2014	12	4	dinoflagellates
Euglena sp.	0	23/07/2014	12	4	euglenophytes
Ankyra ancora	0	23/07/2014	12	4	greens
Botryococcus braunii	0	23/07/2014	12	4	greens
Carteria sp. (Tetraselmis)	0	23/07/2014	12	4	greens
Chlamydomonas sp.	0	23/07/2014	12	4	greens
Chlorella sp.	0	23/07/2014	12	4	greens
Coelastrum microporum	0	23/07/2014	12	4	greens
Coelastrum reticulatum	0	23/07/2014	12	4	greens
Crucigenia sp.	0	23/07/2014	12	4	greens
Crucigenia tetrapedia	0	23/07/2014	12	4	greens
Div. Chloro 7 µ Ø	0	23/07/2014	12	4	greens
Elakatothrix gelatinosa	14	23/07/2014	12	4	greens
Eutetramorus sp.	0	23/07/2014	12	4	greens
Hormidium	70.33333333	23/07/2014	12	4	greens
Kirchneriella sp.	0	23/07/2014	12	4	greens
Lagerheimia sp.	172.6666667	23/07/2014	12	4	greens
Monoraphidium minutum	0	23/07/2014	12	4	greens
Monoraphidium sp.	0	23/07/2014	12	4	greens
Nephrocytium	57.66666667	23/07/2014	12	4	greens
Pediastrum boryanum	0	23/07/2014	12	4	greens
Pediastrum duplex	0	23/07/2014	12	4	greens
Phacotus sp.	126.3333333	23/07/2014	12	4	greens
Scenedesmus acuminatus	0	23/07/2014	12	4	greens
Scenedesmus armatus	0	23/07/2014	12	4	greens
Scenedesmus linearis	0	23/07/2014	12	4	greens
Tetraedron minimum	0	23/07/2014	12	4	greens
Bicosoeca sp.	0	23/07/2014	12	5.5	chrysophytes
Bitrichia chodatii	0	23/07/2014	12	5.5	chrysophytes
Chromulina sp.	0	23/07/2014	12	5.5	chrysophytes
Dinobryon bavaricum	0	23/07/2014	12	5.5	chrysophytes
Dinobryon divergens	98.33333333	23/07/2014	12	5.5	chrysophytes
Dinobryon soziale	0	23/07/2014	12	5.5	chrysophytes
Div. Chrysoflagellaten	0	23/07/2014	12	5.5	chrysophytes
Erkenia sp.	460	23/07/2014	12	5.5	chrysophytes
Kephyrion sp.	0	23/07/2014	12	5.5	chrysophytes
Mallomonas acaroides	14	23/07/2014	12	5.5	chrysophytes
Ochromonas sp.	0	23/07/2014	12	5.5	chrysophytes
Pseudopedinella erk.	0	23/07/2014	12	5.5	chrysophytes
Salpingoeca sp.	0	23/07/2014	12	5.5	chrysophytes
Chroomonas sp.	0	23/07/2014	12	5.5	cryptophytes
Cryptomonas sp.	182.6666667	23/07/2014	12	5.5	cryptophytes
Cyathomonas truncata	0	23/07/2014	12	5.5	cryptophytes
Div. Cryptophyceen	0	23/07/2014	12	5.5	cryptophytes
Katablephris sp.	57.66666667	23/07/2014	12	5.5	cryptophytes
Rhodomonas sp.	115	23/07/2014	12	5.5	cryptophytes
Anabena fl.-aq.	0	23/07/2014	12	5.5	cyanobacteria
Anabena solitaria	0	23/07/2014	12	5.5	cyanobacteria
Aphanizomenon fl.-aq.	281	23/07/2014	12	5.5	cyanobacteria
Aphanocapsa elachista	0	23/07/2014	12	5.5	cyanobacteria
Aphanothece sp.	0	23/07/2014	12	5.5	cyanobacteria
Chroococcus sp.	84.33333333	23/07/2014	12	5.5	cyanobacteria
Coelosphaerium sp.	0	23/07/2014	12	5.5	cyanobacteria
Leptothrix echinata	0	23/07/2014	12	5.5	cyanobacteria
Microcystis aerug.	0	23/07/2014	12	5.5	cyanobacteria
Microcystis sp.	0	23/07/2014	12	5.5	cyanobacteria
Pseudoanabena sp.	0	23/07/2014	12	5.5	cyanobacteria
Spirulina sp.	0	23/07/2014	12	5.5	cyanobacteria
Synechococcus	1437.666667	23/07/2014	12	5.5	cyanobacteria
Woronichinia aponina	0	23/07/2014	12	5.5	cyanobacteria
Woronichinia naeg.	0	23/07/2014	12	5.5	cyanobacteria
Closterium ac. var. variab.	0	23/07/2014	12	5.5	desmids
Closterium acutum	0	23/07/2014	12	5.5	desmids
Closterium pronum	0	23/07/2014	12	5.5	desmids
Closterium sp.	0	23/07/2014	12	5.5	desmids
Cosmarium depr. plankt.	0	23/07/2014	12	5.5	desmids
Cosmarium sp.	0	23/07/2014	12	5.5	desmids
Mougeotia sp.	0	23/07/2014	12	5.5	desmids
Staurastrum sp.	14	23/07/2014	12	5.5	desmids
Achnanthes sp.	0	23/07/2014	12	5.5	diatoms
Asterionella formosa	688.3333333	23/07/2014	12	5.5	diatoms
Cocconeis sp.	0	23/07/2014	12	5.5	diatoms
Cyclotella comta	42	23/07/2014	12	5.5	diatoms
Cyclotella klein bis 7µ Ø	0	23/07/2014	12	5.5	diatoms
Cyclotella sp.	0	23/07/2014	12	5.5	diatoms
Cymbella sp.	14	23/07/2014	12	5.5	diatoms
Diatoma sp.	0	23/07/2014	12	5.5	diatoms
Fragilaria capucina	0	23/07/2014	12	5.5	diatoms
Fragilaria crotonensis	0	23/07/2014	12	5.5	diatoms
Melosira sp.	0	23/07/2014	12	5.5	diatoms
Navicula sp.	0	23/07/2014	12	5.5	diatoms
Nitzschia acicularis	0	23/07/2014	12	5.5	diatoms
Nitzschia sp.	0	23/07/2014	12	5.5	diatoms
Stephanodiscus klein bis 7µ Ø	0	23/07/2014	12	5.5	diatoms
Stephanodiscus sp.	0	23/07/2014	12	5.5	diatoms
Synedra acus	0	23/07/2014	12	5.5	diatoms
Synedra acus ang.	0	23/07/2014	12	5.5	diatoms
Synedra cyclopum	14	23/07/2014	12	5.5	diatoms
Ceratium hirundinella	0	23/07/2014	12	5.5	dinoflagellates
Cysten von Ceratium	0	23/07/2014	12	5.5	dinoflagellates
Gymnodinium helv.	0	23/07/2014	12	5.5	dinoflagellates
Gymnodinium lantzschii	0	23/07/2014	12	5.5	dinoflagellates
Gymnodinium sp.	0	23/07/2014	12	5.5	dinoflagellates
Peridinium aciculiferum	0	23/07/2014	12	5.5	dinoflagellates
Peridinium cinctum	0	23/07/2014	12	5.5	dinoflagellates
Peridinium willei	0	23/07/2014	12	5.5	dinoflagellates
Sonstige Dinocysten	0	23/07/2014	12	5.5	dinoflagellates
Euglena sp.	0	23/07/2014	12	5.5	euglenophytes
Ankyra ancora	0	23/07/2014	12	5.5	greens
Botryococcus braunii	0	23/07/2014	12	5.5	greens
Carteria sp. (Tetraselmis)	0	23/07/2014	12	5.5	greens
Chlamydomonas sp.	0	23/07/2014	12	5.5	greens
Chlorella sp.	0	23/07/2014	12	5.5	greens
Coelastrum microporum	0	23/07/2014	12	5.5	greens
Coelastrum reticulatum	0	23/07/2014	12	5.5	greens
Crucigenia sp.	460	23/07/2014	12	5.5	greens
Crucigenia tetrapedia	0	23/07/2014	12	5.5	greens
Div. Chloro 7 µ Ø	0	23/07/2014	12	5.5	greens
Elakatothrix gelatinosa	0	23/07/2014	12	5.5	greens
Eutetramorus sp.	0	23/07/2014	12	5.5	greens
Hormidium	154.6666667	23/07/2014	12	5.5	greens
Kirchneriella sp.	0	23/07/2014	12	5.5	greens
Lagerheimia sp.	230	23/07/2014	12	5.5	greens
Monoraphidium minutum	0	23/07/2014	12	5.5	greens
Monoraphidium sp.	0	23/07/2014	12	5.5	greens
Nephrocytium	115	23/07/2014	12	5.5	greens
Pediastrum boryanum	0	23/07/2014	12	5.5	greens
Pediastrum duplex	0	23/07/2014	12	5.5	greens
Phacotus sp.	98.33333333	23/07/2014	12	5.5	greens
Scenedesmus acuminatus	0	23/07/2014	12	5.5	greens
Scenedesmus armatus	0	23/07/2014	12	5.5	greens
Scenedesmus linearis	0	23/07/2014	12	5.5	greens
Tetraedron minimum	0	23/07/2014	12	5.5	greens
Bicosoeca sp.	0	23/07/2014	12	7	chrysophytes
Bitrichia chodatii	0	23/07/2014	12	7	chrysophytes
Chromulina sp.	0	23/07/2014	12	7	chrysophytes
Dinobryon bavaricum	0	23/07/2014	12	7	chrysophytes
Dinobryon divergens	98.33333333	23/07/2014	12	7	chrysophytes
Dinobryon soziale	0	23/07/2014	12	7	chrysophytes
Div. Chrysoflagellaten	0	23/07/2014	12	7	chrysophytes
Erkenia sp.	115	23/07/2014	12	7	chrysophytes
Kephyrion sp.	0	23/07/2014	12	7	chrysophytes
Mallomonas acaroides	0	23/07/2014	12	7	chrysophytes
Ochromonas sp.	0	23/07/2014	12	7	chrysophytes
Pseudopedinella erk.	0	23/07/2014	12	7	chrysophytes
Salpingoeca sp.	57.66666667	23/07/2014	12	7	chrysophytes
Chroomonas sp.	0	23/07/2014	12	7	cryptophytes
Cryptomonas sp.	154.6666667	23/07/2014	12	7	cryptophytes
Cyathomonas truncata	0	23/07/2014	12	7	cryptophytes
Div. Cryptophyceen	0	23/07/2014	12	7	cryptophytes
Katablephris sp.	0	23/07/2014	12	7	cryptophytes
Rhodomonas sp.	230	23/07/2014	12	7	cryptophytes
Anabena fl.-aq.	0	23/07/2014	12	7	cyanobacteria
Anabena solitaria	0	23/07/2014	12	7	cyanobacteria
Aphanizomenon fl.-aq.	0	23/07/2014	12	7	cyanobacteria
Aphanocapsa elachista	0	23/07/2014	12	7	cyanobacteria
Aphanothece sp.	0	23/07/2014	12	7	cyanobacteria
Chroococcus sp.	56.33333333	23/07/2014	12	7	cyanobacteria
Coelosphaerium sp.	0	23/07/2014	12	7	cyanobacteria
Leptothrix echinata	0	23/07/2014	12	7	cyanobacteria
Microcystis aerug.	0	23/07/2014	12	7	cyanobacteria
Microcystis sp.	0	23/07/2014	12	7	cyanobacteria
Pseudoanabena sp.	0	23/07/2014	12	7	cyanobacteria
Spirulina sp.	0	23/07/2014	12	7	cyanobacteria
Synechococcus	747.6666667	23/07/2014	12	7	cyanobacteria
Woronichinia aponina	0	23/07/2014	12	7	cyanobacteria
Woronichinia naeg.	0	23/07/2014	12	7	cyanobacteria
Closterium ac. var. variab.	0	23/07/2014	12	7	desmids
Closterium acutum	0	23/07/2014	12	7	desmids
Closterium pronum	0	23/07/2014	12	7	desmids
Closterium sp.	0	23/07/2014	12	7	desmids
Cosmarium depr. plankt.	14	23/07/2014	12	7	desmids
Cosmarium sp.	0	23/07/2014	12	7	desmids
Mougeotia sp.	0	23/07/2014	12	7	desmids
Staurastrum sp.	0	23/07/2014	12	7	desmids
Achnanthes sp.	14	23/07/2014	12	7	diatoms
Asterionella formosa	365.3333333	23/07/2014	12	7	diatoms
Cocconeis sp.	0	23/07/2014	12	7	diatoms
Cyclotella comta	14	23/07/2014	12	7	diatoms
Cyclotella klein bis 7µ Ø	0	23/07/2014	12	7	diatoms
Cyclotella sp.	0	23/07/2014	12	7	diatoms
Cymbella sp.	0	23/07/2014	12	7	diatoms
Diatoma sp.	0	23/07/2014	12	7	diatoms
Fragilaria capucina	0	23/07/2014	12	7	diatoms
Fragilaria crotonensis	0	23/07/2014	12	7	diatoms
Melosira sp.	0	23/07/2014	12	7	diatoms
Navicula sp.	14	23/07/2014	12	7	diatoms
Nitzschia acicularis	0	23/07/2014	12	7	diatoms
Nitzschia sp.	0	23/07/2014	12	7	diatoms
Stephanodiscus klein bis 7µ Ø	57.66666667	23/07/2014	12	7	diatoms
Stephanodiscus sp.	0	23/07/2014	12	7	diatoms
Synedra acus	0	23/07/2014	12	7	diatoms
Synedra acus ang.	0	23/07/2014	12	7	diatoms
Synedra cyclopum	0	23/07/2014	12	7	diatoms
Ceratium hirundinella	14	23/07/2014	12	7	dinoflagellates
Cysten von Ceratium	0	23/07/2014	12	7	dinoflagellates
Gymnodinium helv.	0	23/07/2014	12	7	dinoflagellates
Gymnodinium lantzschii	0	23/07/2014	12	7	dinoflagellates
Gymnodinium sp.	0	23/07/2014	12	7	dinoflagellates
Peridinium aciculiferum	0	23/07/2014	12	7	dinoflagellates
Peridinium cinctum	0	23/07/2014	12	7	dinoflagellates
Peridinium willei	0	23/07/2014	12	7	dinoflagellates
Sonstige Dinocysten	0	23/07/2014	12	7	dinoflagellates
Euglena sp.	0	23/07/2014	12	7	euglenophytes
Ankyra ancora	0	23/07/2014	12	7	greens
Botryococcus braunii	0	23/07/2014	12	7	greens
Carteria sp. (Tetraselmis)	0	23/07/2014	12	7	greens
Chlamydomonas sp.	0	23/07/2014	12	7	greens
Chlorella sp.	0	23/07/2014	12	7	greens
Coelastrum microporum	0	23/07/2014	12	7	greens
Coelastrum reticulatum	0	23/07/2014	12	7	greens
Crucigenia sp.	0	23/07/2014	12	7	greens
Crucigenia tetrapedia	0	23/07/2014	12	7	greens
Div. Chloro 7 µ Ø	0	23/07/2014	12	7	greens
Elakatothrix gelatinosa	0	23/07/2014	12	7	greens
Eutetramorus sp.	0	23/07/2014	12	7	greens
Hormidium	56.33333333	23/07/2014	12	7	greens
Kirchneriella sp.	0	23/07/2014	12	7	greens
Lagerheimia sp.	172.6666667	23/07/2014	12	7	greens
Monoraphidium minutum	0	23/07/2014	12	7	greens
Monoraphidium sp.	0	23/07/2014	12	7	greens
Nephrocytium	115	23/07/2014	12	7	greens
Pediastrum boryanum	0	23/07/2014	12	7	greens
Pediastrum duplex	0	23/07/2014	12	7	greens
Phacotus sp.	42	23/07/2014	12	7	greens
Scenedesmus acuminatus	0	23/07/2014	12	7	greens
Scenedesmus armatus	0	23/07/2014	12	7	greens
Scenedesmus linearis	0	23/07/2014	12	7	greens
Tetraedron minimum	0	23/07/2014	12	7	greens
Bicosoeca sp.	0	23/07/2014	12	8.5	chrysophytes
Bitrichia chodatii	0	23/07/2014	12	8.5	chrysophytes
Chromulina sp.	0	23/07/2014	12	8.5	chrysophytes
Dinobryon bavaricum	0	23/07/2014	12	8.5	chrysophytes
Dinobryon divergens	0	23/07/2014	12	8.5	chrysophytes
Dinobryon soziale	0	23/07/2014	12	8.5	chrysophytes
Div. Chrysoflagellaten	0	23/07/2014	12	8.5	chrysophytes
Erkenia sp.	0	23/07/2014	12	8.5	chrysophytes
Kephyrion sp.	0	23/07/2014	12	8.5	chrysophytes
Mallomonas acaroides	0	23/07/2014	12	8.5	chrysophytes
Ochromonas sp.	0	23/07/2014	12	8.5	chrysophytes
Pseudopedinella erk.	0	23/07/2014	12	8.5	chrysophytes
Salpingoeca sp.	0	23/07/2014	12	8.5	chrysophytes
Chroomonas sp.	0	23/07/2014	12	8.5	cryptophytes
Cryptomonas sp.	42	23/07/2014	12	8.5	cryptophytes
Cyathomonas truncata	0	23/07/2014	12	8.5	cryptophytes
Div. Cryptophyceen	0	23/07/2014	12	8.5	cryptophytes
Katablephris sp.	0	23/07/2014	12	8.5	cryptophytes
Rhodomonas sp.	57.66666667	23/07/2014	12	8.5	cryptophytes
Anabena fl.-aq.	0	23/07/2014	12	8.5	cyanobacteria
Anabena solitaria	0	23/07/2014	12	8.5	cyanobacteria
Aphanizomenon fl.-aq.	0	23/07/2014	12	8.5	cyanobacteria
Aphanocapsa elachista	0	23/07/2014	12	8.5	cyanobacteria
Aphanothece sp.	0	23/07/2014	12	8.5	cyanobacteria
Chroococcus sp.	0	23/07/2014	12	8.5	cyanobacteria
Coelosphaerium sp.	0	23/07/2014	12	8.5	cyanobacteria
Leptothrix echinata	0	23/07/2014	12	8.5	cyanobacteria
Microcystis aerug.	0	23/07/2014	12	8.5	cyanobacteria
Microcystis sp.	0	23/07/2014	12	8.5	cyanobacteria
Pseudoanabena sp.	0	23/07/2014	12	8.5	cyanobacteria
Spirulina sp.	0	23/07/2014	12	8.5	cyanobacteria
Synechococcus	115	23/07/2014	12	8.5	cyanobacteria
Woronichinia aponina	0	23/07/2014	12	8.5	cyanobacteria
Woronichinia naeg.	0	23/07/2014	12	8.5	cyanobacteria
Closterium ac. var. variab.	14	23/07/2014	12	8.5	desmids
Closterium acutum	0	23/07/2014	12	8.5	desmids
Closterium pronum	0	23/07/2014	12	8.5	desmids
Closterium sp.	0	23/07/2014	12	8.5	desmids
Cosmarium depr. plankt.	0	23/07/2014	12	8.5	desmids
Cosmarium sp.	0	23/07/2014	12	8.5	desmids
Mougeotia sp.	0	23/07/2014	12	8.5	desmids
Staurastrum sp.	0	23/07/2014	12	8.5	desmids
Achnanthes sp.	0	23/07/2014	12	8.5	diatoms
Asterionella formosa	28	23/07/2014	12	8.5	diatoms
Cocconeis sp.	0	23/07/2014	12	8.5	diatoms
Cyclotella comta	14	23/07/2014	12	8.5	diatoms
Cyclotella klein bis 7µ Ø	0	23/07/2014	12	8.5	diatoms
Cyclotella sp.	0	23/07/2014	12	8.5	diatoms
Cymbella sp.	0	23/07/2014	12	8.5	diatoms
Diatoma sp.	0	23/07/2014	12	8.5	diatoms
Fragilaria capucina	0	23/07/2014	12	8.5	diatoms
Fragilaria crotonensis	0	23/07/2014	12	8.5	diatoms
Melosira sp.	0	23/07/2014	12	8.5	diatoms
Navicula sp.	0	23/07/2014	12	8.5	diatoms
Nitzschia acicularis	0	23/07/2014	12	8.5	diatoms
Nitzschia sp.	0	23/07/2014	12	8.5	diatoms
Stephanodiscus klein bis 7µ Ø	0	23/07/2014	12	8.5	diatoms
Stephanodiscus sp.	0	23/07/2014	12	8.5	diatoms
Synedra acus	0	23/07/2014	12	8.5	diatoms
Synedra acus ang.	0	23/07/2014	12	8.5	diatoms
Synedra cyclopum	0	23/07/2014	12	8.5	diatoms
Ceratium hirundinella	0	23/07/2014	12	8.5	dinoflagellates
Cysten von Ceratium	0	23/07/2014	12	8.5	dinoflagellates
Gymnodinium helv.	0	23/07/2014	12	8.5	dinoflagellates
Gymnodinium lantzschii	0	23/07/2014	12	8.5	dinoflagellates
Gymnodinium sp.	0	23/07/2014	12	8.5	dinoflagellates
Peridinium aciculiferum	0	23/07/2014	12	8.5	dinoflagellates
Peridinium cinctum	0	23/07/2014	12	8.5	dinoflagellates
Peridinium willei	0	23/07/2014	12	8.5	dinoflagellates
Sonstige Dinocysten	0	23/07/2014	12	8.5	dinoflagellates
Euglena sp.	0	23/07/2014	12	8.5	euglenophytes
Ankyra ancora	0	23/07/2014	12	8.5	greens
Botryococcus braunii	0	23/07/2014	12	8.5	greens
Carteria sp. (Tetraselmis)	0	23/07/2014	12	8.5	greens
Chlamydomonas sp.	0	23/07/2014	12	8.5	greens
Chlorella sp.	0	23/07/2014	12	8.5	greens
Coelastrum microporum	0	23/07/2014	12	8.5	greens
Coelastrum reticulatum	0	23/07/2014	12	8.5	greens
Crucigenia sp.	0	23/07/2014	12	8.5	greens
Crucigenia tetrapedia	0	23/07/2014	12	8.5	greens
Div. Chloro 7 µ Ø	0	23/07/2014	12	8.5	greens
Elakatothrix gelatinosa	0	23/07/2014	12	8.5	greens
Eutetramorus sp.	0	23/07/2014	12	8.5	greens
Hormidium	0	23/07/2014	12	8.5	greens
Kirchneriella sp.	0	23/07/2014	12	8.5	greens
Lagerheimia sp.	0	23/07/2014	12	8.5	greens
Monoraphidium minutum	0	23/07/2014	12	8.5	greens
Monoraphidium sp.	0	23/07/2014	12	8.5	greens
Nephrocytium	0	23/07/2014	12	8.5	greens
Pediastrum boryanum	0	23/07/2014	12	8.5	greens
Pediastrum duplex	0	23/07/2014	12	8.5	greens
Phacotus sp.	14	23/07/2014	12	8.5	greens
Scenedesmus acuminatus	0	23/07/2014	12	8.5	greens
Scenedesmus armatus	0	23/07/2014	12	8.5	greens
Scenedesmus linearis	0	23/07/2014	12	8.5	greens
Tetraedron minimum	0	23/07/2014	12	8.5	greens
Bicosoeca sp.	0	31/07/2014	8	1	chrysophytes
Bitrichia chodatii	57.66666667	31/07/2014	8	1	chrysophytes
Chromulina sp.	0	31/07/2014	8	1	chrysophytes
Dinobryon bavaricum	0	31/07/2014	8	1	chrysophytes
Dinobryon divergens	140.6666667	31/07/2014	8	1	chrysophytes
Dinobryon soziale	0	31/07/2014	8	1	chrysophytes
Div. Chrysoflagellaten	0	31/07/2014	8	1	chrysophytes
Erkenia sp.	1322.666667	31/07/2014	8	1	chrysophytes
Kephyrion sp.	0	31/07/2014	8	1	chrysophytes
Mallomonas acaroides	28	31/07/2014	8	1	chrysophytes
Ochromonas sp.	0	31/07/2014	8	1	chrysophytes
Pseudopedinella erk.	57.66666667	31/07/2014	8	1	chrysophytes
Salpingoeca sp.	0	31/07/2014	8	1	chrysophytes
Chroomonas sp.	0	31/07/2014	8	1	cryptophytes
Cryptomonas sp.	702.6666667	31/07/2014	8	1	cryptophytes
Cyathomonas truncata	0	31/07/2014	8	1	cryptophytes
Div. Cryptophyceen	0	31/07/2014	8	1	cryptophytes
Katablephris sp.	0	31/07/2014	8	1	cryptophytes
Rhodomonas sp.	230	31/07/2014	8	1	cryptophytes
Anabena fl.-aq.	0	31/07/2014	8	1	cyanobacteria
Anabena solitaria	0	31/07/2014	8	1	cyanobacteria
Aphanizomenon fl.-aq.	0	31/07/2014	8	1	cyanobacteria
Aphanocapsa elachista	0	31/07/2014	8	1	cyanobacteria
Aphanothece sp.	0	31/07/2014	8	1	cyanobacteria
Chroococcus sp.	0	31/07/2014	8	1	cyanobacteria
Coelosphaerium sp.	0	31/07/2014	8	1	cyanobacteria
Leptothrix echinata	0	31/07/2014	8	1	cyanobacteria
Microcystis aerug.	0	31/07/2014	8	1	cyanobacteria
Microcystis sp.	0	31/07/2014	8	1	cyanobacteria
Pseudoanabena sp.	0	31/07/2014	8	1	cyanobacteria
Spirulina sp.	0	31/07/2014	8	1	cyanobacteria
Synechococcus	3220	31/07/2014	8	1	cyanobacteria
Woronichinia aponina	0	31/07/2014	8	1	cyanobacteria
Woronichinia naeg.	0	31/07/2014	8	1	cyanobacteria
Closterium ac. var. variab.	0	31/07/2014	8	1	desmids
Closterium acutum	0	31/07/2014	8	1	desmids
Closterium pronum	0	31/07/2014	8	1	desmids
Closterium sp.	0	31/07/2014	8	1	desmids
Cosmarium depr. plankt.	14	31/07/2014	8	1	desmids
Cosmarium sp.	0	31/07/2014	8	1	desmids
Mougeotia sp.	0	31/07/2014	8	1	desmids
Staurastrum sp.	14	31/07/2014	8	1	desmids
Achnanthes sp.	0	31/07/2014	8	1	diatoms
Asterionella formosa	42	31/07/2014	8	1	diatoms
Cocconeis sp.	0	31/07/2014	8	1	diatoms
Cyclotella comta	112.3333333	31/07/2014	8	1	diatoms
Cyclotella klein bis 7µ Ø	0	31/07/2014	8	1	diatoms
Cyclotella sp.	0	31/07/2014	8	1	diatoms
Cymbella sp.	0	31/07/2014	8	1	diatoms
Diatoma sp.	0	31/07/2014	8	1	diatoms
Fragilaria capucina	0	31/07/2014	8	1	diatoms
Fragilaria crotonensis	0	31/07/2014	8	1	diatoms
Melosira sp.	0	31/07/2014	8	1	diatoms
Navicula sp.	0	31/07/2014	8	1	diatoms
Nitzschia acicularis	0	31/07/2014	8	1	diatoms
Nitzschia sp.	0	31/07/2014	8	1	diatoms
Stephanodiscus klein bis 7µ Ø	115	31/07/2014	8	1	diatoms
Stephanodiscus sp.	0	31/07/2014	8	1	diatoms
Synedra acus	0	31/07/2014	8	1	diatoms
Synedra acus ang.	0	31/07/2014	8	1	diatoms
Synedra cyclopum	14	31/07/2014	8	1	diatoms
Ceratium hirundinella	0	31/07/2014	8	1	dinoflagellates
Cysten von Ceratium	0	31/07/2014	8	1	dinoflagellates
Gymnodinium helv.	0	31/07/2014	8	1	dinoflagellates
Gymnodinium lantzschii	0	31/07/2014	8	1	dinoflagellates
Gymnodinium sp.	0	31/07/2014	8	1	dinoflagellates
Peridinium aciculiferum	28	31/07/2014	8	1	dinoflagellates
Peridinium cinctum	0	31/07/2014	8	1	dinoflagellates
Peridinium willei	0	31/07/2014	8	1	dinoflagellates
Sonstige Dinocysten	0	31/07/2014	8	1	dinoflagellates
Euglena sp.	0	31/07/2014	8	1	euglenophytes
Ankyra ancora	28	31/07/2014	8	1	greens
Botryococcus braunii	0	31/07/2014	8	1	greens
Carteria sp. (Tetraselmis)	0	31/07/2014	8	1	greens
Chlamydomonas sp.	115	31/07/2014	8	1	greens
Chlorella sp.	0	31/07/2014	8	1	greens
Coelastrum microporum	0	31/07/2014	8	1	greens
Coelastrum reticulatum	0	31/07/2014	8	1	greens
Crucigenia sp.	0	31/07/2014	8	1	greens
Crucigenia tetrapedia	0	31/07/2014	8	1	greens
Div. Chloro 7 µ Ø	0	31/07/2014	8	1	greens
Elakatothrix gelatinosa	0	31/07/2014	8	1	greens
Eutetramorus sp.	0	31/07/2014	8	1	greens
Hormidium	112.3333333	31/07/2014	8	1	greens
Kirchneriella sp.	0	31/07/2014	8	1	greens
Lagerheimia sp.	115	31/07/2014	8	1	greens
Monoraphidium minutum	0	31/07/2014	8	1	greens
Monoraphidium sp.	0	31/07/2014	8	1	greens
Nephrocytium	57.66666667	31/07/2014	8	1	greens
Pediastrum boryanum	0	31/07/2014	8	1	greens
Pediastrum duplex	0	31/07/2014	8	1	greens
Phacotus sp.	154.6666667	31/07/2014	8	1	greens
Scenedesmus acuminatus	0	31/07/2014	8	1	greens
Scenedesmus armatus	0	31/07/2014	8	1	greens
Scenedesmus linearis	287.6666667	31/07/2014	8	1	greens
Tetraedron minimum	0	31/07/2014	8	1	greens
Bicosoeca sp.	0	31/07/2014	8	2.5	chrysophytes
Bitrichia chodatii	57.66666667	31/07/2014	8	2.5	chrysophytes
Chromulina sp.	0	31/07/2014	8	2.5	chrysophytes
Dinobryon bavaricum	0	31/07/2014	8	2.5	chrysophytes
Dinobryon divergens	14	31/07/2014	8	2.5	chrysophytes
Dinobryon soziale	0	31/07/2014	8	2.5	chrysophytes
Div. Chrysoflagellaten	0	31/07/2014	8	2.5	chrysophytes
Erkenia sp.	575	31/07/2014	8	2.5	chrysophytes
Kephyrion sp.	57.66666667	31/07/2014	8	2.5	chrysophytes
Mallomonas acaroides	0	31/07/2014	8	2.5	chrysophytes
Ochromonas sp.	0	31/07/2014	8	2.5	chrysophytes
Pseudopedinella erk.	0	31/07/2014	8	2.5	chrysophytes
Salpingoeca sp.	0	31/07/2014	8	2.5	chrysophytes
Chroomonas sp.	0	31/07/2014	8	2.5	cryptophytes
Cryptomonas sp.	660.3333333	31/07/2014	8	2.5	cryptophytes
Cyathomonas truncata	0	31/07/2014	8	2.5	cryptophytes
Div. Cryptophyceen	0	31/07/2014	8	2.5	cryptophytes
Katablephris sp.	0	31/07/2014	8	2.5	cryptophytes
Rhodomonas sp.	172.6666667	31/07/2014	8	2.5	cryptophytes
Anabena fl.-aq.	253	31/07/2014	8	2.5	cyanobacteria
Anabena solitaria	0	31/07/2014	8	2.5	cyanobacteria
Aphanizomenon fl.-aq.	0	31/07/2014	8	2.5	cyanobacteria
Aphanocapsa elachista	0	31/07/2014	8	2.5	cyanobacteria
Aphanothece sp.	0	31/07/2014	8	2.5	cyanobacteria
Chroococcus sp.	28	31/07/2014	8	2.5	cyanobacteria
Coelosphaerium sp.	0	31/07/2014	8	2.5	cyanobacteria
Leptothrix echinata	0	31/07/2014	8	2.5	cyanobacteria
Microcystis aerug.	0	31/07/2014	8	2.5	cyanobacteria
Microcystis sp.	0	31/07/2014	8	2.5	cyanobacteria
Pseudoanabena sp.	0	31/07/2014	8	2.5	cyanobacteria
Spirulina sp.	0	31/07/2014	8	2.5	cyanobacteria
Synechococcus	1437.666667	31/07/2014	8	2.5	cyanobacteria
Woronichinia aponina	0	31/07/2014	8	2.5	cyanobacteria
Woronichinia naeg.	0	31/07/2014	8	2.5	cyanobacteria
Closterium ac. var. variab.	0	31/07/2014	8	2.5	desmids
Closterium acutum	0	31/07/2014	8	2.5	desmids
Closterium pronum	0	31/07/2014	8	2.5	desmids
Closterium sp.	0	31/07/2014	8	2.5	desmids
Cosmarium depr. plankt.	14	31/07/2014	8	2.5	desmids
Cosmarium sp.	0	31/07/2014	8	2.5	desmids
Mougeotia sp.	0	31/07/2014	8	2.5	desmids
Staurastrum sp.	14	31/07/2014	8	2.5	desmids
Achnanthes sp.	0	31/07/2014	8	2.5	diatoms
Asterionella formosa	28	31/07/2014	8	2.5	diatoms
Cocconeis sp.	0	31/07/2014	8	2.5	diatoms
Cyclotella comta	253	31/07/2014	8	2.5	diatoms
Cyclotella klein bis 7µ Ø	57.66666667	31/07/2014	8	2.5	diatoms
Cyclotella sp.	0	31/07/2014	8	2.5	diatoms
Cymbella sp.	0	31/07/2014	8	2.5	diatoms
Diatoma sp.	0	31/07/2014	8	2.5	diatoms
Fragilaria capucina	0	31/07/2014	8	2.5	diatoms
Fragilaria crotonensis	0	31/07/2014	8	2.5	diatoms
Melosira sp.	0	31/07/2014	8	2.5	diatoms
Navicula sp.	0	31/07/2014	8	2.5	diatoms
Nitzschia acicularis	0	31/07/2014	8	2.5	diatoms
Nitzschia sp.	0	31/07/2014	8	2.5	diatoms
Stephanodiscus klein bis 7µ Ø	115	31/07/2014	8	2.5	diatoms
Stephanodiscus sp.	0	31/07/2014	8	2.5	diatoms
Synedra acus	0	31/07/2014	8	2.5	diatoms
Synedra acus ang.	0	31/07/2014	8	2.5	diatoms
Synedra cyclopum	14	31/07/2014	8	2.5	diatoms
Ceratium hirundinella	14	31/07/2014	8	2.5	dinoflagellates
Cysten von Ceratium	0	31/07/2014	8	2.5	dinoflagellates
Gymnodinium helv.	0	31/07/2014	8	2.5	dinoflagellates
Gymnodinium lantzschii	0	31/07/2014	8	2.5	dinoflagellates
Gymnodinium sp.	0	31/07/2014	8	2.5	dinoflagellates
Peridinium aciculiferum	42	31/07/2014	8	2.5	dinoflagellates
Peridinium cinctum	0	31/07/2014	8	2.5	dinoflagellates
Peridinium willei	0	31/07/2014	8	2.5	dinoflagellates
Sonstige Dinocysten	0	31/07/2014	8	2.5	dinoflagellates
Euglena sp.	0	31/07/2014	8	2.5	euglenophytes
Ankyra ancora	14	31/07/2014	8	2.5	greens
Botryococcus braunii	0	31/07/2014	8	2.5	greens
Carteria sp. (Tetraselmis)	0	31/07/2014	8	2.5	greens
Chlamydomonas sp.	0	31/07/2014	8	2.5	greens
Chlorella sp.	0	31/07/2014	8	2.5	greens
Coelastrum microporum	0	31/07/2014	8	2.5	greens
Coelastrum reticulatum	0	31/07/2014	8	2.5	greens
Crucigenia sp.	0	31/07/2014	8	2.5	greens
Crucigenia tetrapedia	230	31/07/2014	8	2.5	greens
Div. Chloro 7 µ Ø	0	31/07/2014	8	2.5	greens
Elakatothrix gelatinosa	14	31/07/2014	8	2.5	greens
Eutetramorus sp.	0	31/07/2014	8	2.5	greens
Hormidium	98.33333333	31/07/2014	8	2.5	greens
Kirchneriella sp.	0	31/07/2014	8	2.5	greens
Lagerheimia sp.	0	31/07/2014	8	2.5	greens
Monoraphidium minutum	0	31/07/2014	8	2.5	greens
Monoraphidium sp.	0	31/07/2014	8	2.5	greens
Nephrocytium	57.66666667	31/07/2014	8	2.5	greens
Pediastrum boryanum	0	31/07/2014	8	2.5	greens
Pediastrum duplex	0	31/07/2014	8	2.5	greens
Phacotus sp.	267	31/07/2014	8	2.5	greens
Scenedesmus acuminatus	0	31/07/2014	8	2.5	greens
Scenedesmus armatus	0	31/07/2014	8	2.5	greens
Scenedesmus linearis	0	31/07/2014	8	2.5	greens
Tetraedron minimum	0	31/07/2014	8	2.5	greens
Bicosoeca sp.	0	31/07/2014	8	4	chrysophytes
Bitrichia chodatii	0	31/07/2014	8	4	chrysophytes
Chromulina sp.	0	31/07/2014	8	4	chrysophytes
Dinobryon bavaricum	0	31/07/2014	8	4	chrysophytes
Dinobryon divergens	28	31/07/2014	8	4	chrysophytes
Dinobryon soziale	0	31/07/2014	8	4	chrysophytes
Div. Chrysoflagellaten	0	31/07/2014	8	4	chrysophytes
Erkenia sp.	460	31/07/2014	8	4	chrysophytes
Kephyrion sp.	0	31/07/2014	8	4	chrysophytes
Mallomonas acaroides	0	31/07/2014	8	4	chrysophytes
Ochromonas sp.	0	31/07/2014	8	4	chrysophytes
Pseudopedinella erk.	0	31/07/2014	8	4	chrysophytes
Salpingoeca sp.	0	31/07/2014	8	4	chrysophytes
Chroomonas sp.	0	31/07/2014	8	4	cryptophytes
Cryptomonas sp.	758.6666667	31/07/2014	8	4	cryptophytes
Cyathomonas truncata	0	31/07/2014	8	4	cryptophytes
Div. Cryptophyceen	0	31/07/2014	8	4	cryptophytes
Katablephris sp.	0	31/07/2014	8	4	cryptophytes
Rhodomonas sp.	57.66666667	31/07/2014	8	4	cryptophytes
Anabena fl.-aq.	0	31/07/2014	8	4	cyanobacteria
Anabena solitaria	0	31/07/2014	8	4	cyanobacteria
Aphanizomenon fl.-aq.	0	31/07/2014	8	4	cyanobacteria
Aphanocapsa elachista	0	31/07/2014	8	4	cyanobacteria
Aphanothece sp.	0	31/07/2014	8	4	cyanobacteria
Chroococcus sp.	0	31/07/2014	8	4	cyanobacteria
Coelosphaerium sp.	0	31/07/2014	8	4	cyanobacteria
Leptothrix echinata	0	31/07/2014	8	4	cyanobacteria
Microcystis aerug.	0	31/07/2014	8	4	cyanobacteria
Microcystis sp.	0	31/07/2014	8	4	cyanobacteria
Pseudoanabena sp.	0	31/07/2014	8	4	cyanobacteria
Spirulina sp.	0	31/07/2014	8	4	cyanobacteria
Synechococcus	1782.666667	31/07/2014	8	4	cyanobacteria
Woronichinia aponina	0	31/07/2014	8	4	cyanobacteria
Woronichinia naeg.	0	31/07/2014	8	4	cyanobacteria
Closterium ac. var. variab.	0	31/07/2014	8	4	desmids
Closterium acutum	0	31/07/2014	8	4	desmids
Closterium pronum	0	31/07/2014	8	4	desmids
Closterium sp.	0	31/07/2014	8	4	desmids
Cosmarium depr. plankt.	14	31/07/2014	8	4	desmids
Cosmarium sp.	0	31/07/2014	8	4	desmids
Mougeotia sp.	0	31/07/2014	8	4	desmids
Staurastrum sp.	0	31/07/2014	8	4	desmids
Achnanthes sp.	0	31/07/2014	8	4	diatoms
Asterionella formosa	70.33333333	31/07/2014	8	4	diatoms
Cocconeis sp.	0	31/07/2014	8	4	diatoms
Cyclotella comta	56.33333333	31/07/2014	8	4	diatoms
Cyclotella klein bis 7µ Ø	0	31/07/2014	8	4	diatoms
Cyclotella sp.	0	31/07/2014	8	4	diatoms
Cymbella sp.	0	31/07/2014	8	4	diatoms
Diatoma sp.	0	31/07/2014	8	4	diatoms
Fragilaria capucina	0	31/07/2014	8	4	diatoms
Fragilaria crotonensis	0	31/07/2014	8	4	diatoms
Melosira sp.	0	31/07/2014	8	4	diatoms
Navicula sp.	0	31/07/2014	8	4	diatoms
Nitzschia acicularis	0	31/07/2014	8	4	diatoms
Nitzschia sp.	0	31/07/2014	8	4	diatoms
Stephanodiscus klein bis 7µ Ø	57.66666667	31/07/2014	8	4	diatoms
Stephanodiscus sp.	0	31/07/2014	8	4	diatoms
Synedra acus	0	31/07/2014	8	4	diatoms
Synedra acus ang.	0	31/07/2014	8	4	diatoms
Synedra cyclopum	0	31/07/2014	8	4	diatoms
Ceratium hirundinella	14	31/07/2014	8	4	dinoflagellates
Cysten von Ceratium	0	31/07/2014	8	4	dinoflagellates
Gymnodinium helv.	0	31/07/2014	8	4	dinoflagellates
Gymnodinium lantzschii	0	31/07/2014	8	4	dinoflagellates
Gymnodinium sp.	0	31/07/2014	8	4	dinoflagellates
Peridinium aciculiferum	0	31/07/2014	8	4	dinoflagellates
Peridinium cinctum	0	31/07/2014	8	4	dinoflagellates
Peridinium willei	0	31/07/2014	8	4	dinoflagellates
Sonstige Dinocysten	0	31/07/2014	8	4	dinoflagellates
Euglena sp.	0	31/07/2014	8	4	euglenophytes
Ankyra ancora	28	31/07/2014	8	4	greens
Botryococcus braunii	0	31/07/2014	8	4	greens
Carteria sp. (Tetraselmis)	57.66666667	31/07/2014	8	4	greens
Chlamydomonas sp.	0	31/07/2014	8	4	greens
Chlorella sp.	0	31/07/2014	8	4	greens
Coelastrum microporum	0	31/07/2014	8	4	greens
Coelastrum reticulatum	0	31/07/2014	8	4	greens
Crucigenia sp.	0	31/07/2014	8	4	greens
Crucigenia tetrapedia	0	31/07/2014	8	4	greens
Div. Chloro 7 µ Ø	0	31/07/2014	8	4	greens
Elakatothrix gelatinosa	42	31/07/2014	8	4	greens
Eutetramorus sp.	0	31/07/2014	8	4	greens
Hormidium	0	31/07/2014	8	4	greens
Kirchneriella sp.	0	31/07/2014	8	4	greens
Lagerheimia sp.	57.66666667	31/07/2014	8	4	greens
Monoraphidium minutum	0	31/07/2014	8	4	greens
Monoraphidium sp.	0	31/07/2014	8	4	greens
Nephrocytium	115	31/07/2014	8	4	greens
Pediastrum boryanum	0	31/07/2014	8	4	greens
Pediastrum duplex	0	31/07/2014	8	4	greens
Phacotus sp.	140.6666667	31/07/2014	8	4	greens
Scenedesmus acuminatus	0	31/07/2014	8	4	greens
Scenedesmus armatus	0	31/07/2014	8	4	greens
Scenedesmus linearis	0	31/07/2014	8	4	greens
Tetraedron minimum	0	31/07/2014	8	4	greens
Bicosoeca sp.	0	31/07/2014	8	5.5	chrysophytes
Bitrichia chodatii	57.66666667	31/07/2014	8	5.5	chrysophytes
Chromulina sp.	0	31/07/2014	8	5.5	chrysophytes
Dinobryon bavaricum	0	31/07/2014	8	5.5	chrysophytes
Dinobryon divergens	70.33333333	31/07/2014	8	5.5	chrysophytes
Dinobryon soziale	0	31/07/2014	8	5.5	chrysophytes
Div. Chrysoflagellaten	0	31/07/2014	8	5.5	chrysophytes
Erkenia sp.	230	31/07/2014	8	5.5	chrysophytes
Kephyrion sp.	0	31/07/2014	8	5.5	chrysophytes
Mallomonas acaroides	0	31/07/2014	8	5.5	chrysophytes
Ochromonas sp.	0	31/07/2014	8	5.5	chrysophytes
Pseudopedinella erk.	0	31/07/2014	8	5.5	chrysophytes
Salpingoeca sp.	0	31/07/2014	8	5.5	chrysophytes
Chroomonas sp.	0	31/07/2014	8	5.5	cryptophytes
Cryptomonas sp.	477.6666667	31/07/2014	8	5.5	cryptophytes
Cyathomonas truncata	0	31/07/2014	8	5.5	cryptophytes
Div. Cryptophyceen	0	31/07/2014	8	5.5	cryptophytes
Katablephris sp.	0	31/07/2014	8	5.5	cryptophytes
Rhodomonas sp.	0	31/07/2014	8	5.5	cryptophytes
Anabena fl.-aq.	0	31/07/2014	8	5.5	cyanobacteria
Anabena solitaria	0	31/07/2014	8	5.5	cyanobacteria
Aphanizomenon fl.-aq.	281	31/07/2014	8	5.5	cyanobacteria
Aphanocapsa elachista	0	31/07/2014	8	5.5	cyanobacteria
Aphanothece sp.	0	31/07/2014	8	5.5	cyanobacteria
Chroococcus sp.	0	31/07/2014	8	5.5	cyanobacteria
Coelosphaerium sp.	0	31/07/2014	8	5.5	cyanobacteria
Leptothrix echinata	0	31/07/2014	8	5.5	cyanobacteria
Microcystis aerug.	0	31/07/2014	8	5.5	cyanobacteria
Microcystis sp.	0	31/07/2014	8	5.5	cyanobacteria
Pseudoanabena sp.	0	31/07/2014	8	5.5	cyanobacteria
Spirulina sp.	0	31/07/2014	8	5.5	cyanobacteria
Synechococcus	2472.666667	31/07/2014	8	5.5	cyanobacteria
Woronichinia aponina	0	31/07/2014	8	5.5	cyanobacteria
Woronichinia naeg.	0	31/07/2014	8	5.5	cyanobacteria
Closterium ac. var. variab.	0	31/07/2014	8	5.5	desmids
Closterium acutum	0	31/07/2014	8	5.5	desmids
Closterium pronum	0	31/07/2014	8	5.5	desmids
Closterium sp.	0	31/07/2014	8	5.5	desmids
Cosmarium depr. plankt.	14	31/07/2014	8	5.5	desmids
Cosmarium sp.	0	31/07/2014	8	5.5	desmids
Mougeotia sp.	0	31/07/2014	8	5.5	desmids
Staurastrum sp.	14	31/07/2014	8	5.5	desmids
Achnanthes sp.	0	31/07/2014	8	5.5	diatoms
Asterionella formosa	42	31/07/2014	8	5.5	diatoms
Cocconeis sp.	0	31/07/2014	8	5.5	diatoms
Cyclotella comta	112.3333333	31/07/2014	8	5.5	diatoms
Cyclotella klein bis 7µ Ø	57.66666667	31/07/2014	8	5.5	diatoms
Cyclotella sp.	0	31/07/2014	8	5.5	diatoms
Cymbella sp.	0	31/07/2014	8	5.5	diatoms
Diatoma sp.	0	31/07/2014	8	5.5	diatoms
Fragilaria capucina	0	31/07/2014	8	5.5	diatoms
Fragilaria crotonensis	0	31/07/2014	8	5.5	diatoms
Melosira sp.	0	31/07/2014	8	5.5	diatoms
Navicula sp.	0	31/07/2014	8	5.5	diatoms
Nitzschia acicularis	0	31/07/2014	8	5.5	diatoms
Nitzschia sp.	0	31/07/2014	8	5.5	diatoms
Stephanodiscus klein bis 7µ Ø	57.66666667	31/07/2014	8	5.5	diatoms
Stephanodiscus sp.	0	31/07/2014	8	5.5	diatoms
Synedra acus	0	31/07/2014	8	5.5	diatoms
Synedra acus ang.	0	31/07/2014	8	5.5	diatoms
Synedra cyclopum	14	31/07/2014	8	5.5	diatoms
Ceratium hirundinella	14	31/07/2014	8	5.5	dinoflagellates
Cysten von Ceratium	0	31/07/2014	8	5.5	dinoflagellates
Gymnodinium helv.	0	31/07/2014	8	5.5	dinoflagellates
Gymnodinium lantzschii	0	31/07/2014	8	5.5	dinoflagellates
Gymnodinium sp.	0	31/07/2014	8	5.5	dinoflagellates
Peridinium aciculiferum	70.33333333	31/07/2014	8	5.5	dinoflagellates
Peridinium cinctum	0	31/07/2014	8	5.5	dinoflagellates
Peridinium willei	0	31/07/2014	8	5.5	dinoflagellates
Sonstige Dinocysten	0	31/07/2014	8	5.5	dinoflagellates
Euglena sp.	0	31/07/2014	8	5.5	euglenophytes
Ankyra ancora	0	31/07/2014	8	5.5	greens
Botryococcus braunii	0	31/07/2014	8	5.5	greens
Carteria sp. (Tetraselmis)	0	31/07/2014	8	5.5	greens
Chlamydomonas sp.	0	31/07/2014	8	5.5	greens
Chlorella sp.	0	31/07/2014	8	5.5	greens
Coelastrum microporum	0	31/07/2014	8	5.5	greens
Coelastrum reticulatum	0	31/07/2014	8	5.5	greens
Crucigenia sp.	0	31/07/2014	8	5.5	greens
Crucigenia tetrapedia	230	31/07/2014	8	5.5	greens
Div. Chloro 7 µ Ø	0	31/07/2014	8	5.5	greens
Elakatothrix gelatinosa	14	31/07/2014	8	5.5	greens
Eutetramorus sp.	0	31/07/2014	8	5.5	greens
Hormidium	0	31/07/2014	8	5.5	greens
Kirchneriella sp.	0	31/07/2014	8	5.5	greens
Lagerheimia sp.	115	31/07/2014	8	5.5	greens
Monoraphidium minutum	0	31/07/2014	8	5.5	greens
Monoraphidium sp.	0	31/07/2014	8	5.5	greens
Nephrocytium	57.66666667	31/07/2014	8	5.5	greens
Pediastrum boryanum	0	31/07/2014	8	5.5	greens
Pediastrum duplex	0	31/07/2014	8	5.5	greens
Phacotus sp.	140.6666667	31/07/2014	8	5.5	greens
Scenedesmus acuminatus	0	31/07/2014	8	5.5	greens
Scenedesmus armatus	0	31/07/2014	8	5.5	greens
Scenedesmus linearis	0	31/07/2014	8	5.5	greens
Tetraedron minimum	0	31/07/2014	8	5.5	greens
Bicosoeca sp.	0	31/07/2014	8	7	chrysophytes
Bitrichia chodatii	0	31/07/2014	8	7	chrysophytes
Chromulina sp.	0	31/07/2014	8	7	chrysophytes
Dinobryon bavaricum	0	31/07/2014	8	7	chrysophytes
Dinobryon divergens	70.33333333	31/07/2014	8	7	chrysophytes
Dinobryon soziale	0	31/07/2014	8	7	chrysophytes
Div. Chrysoflagellaten	0	31/07/2014	8	7	chrysophytes
Erkenia sp.	115	31/07/2014	8	7	chrysophytes
Kephyrion sp.	0	31/07/2014	8	7	chrysophytes
Mallomonas acaroides	0	31/07/2014	8	7	chrysophytes
Ochromonas sp.	0	31/07/2014	8	7	chrysophytes
Pseudopedinella erk.	0	31/07/2014	8	7	chrysophytes
Salpingoeca sp.	0	31/07/2014	8	7	chrysophytes
Chroomonas sp.	0	31/07/2014	8	7	cryptophytes
Cryptomonas sp.	168.6666667	31/07/2014	8	7	cryptophytes
Cyathomonas truncata	0	31/07/2014	8	7	cryptophytes
Div. Cryptophyceen	0	31/07/2014	8	7	cryptophytes
Katablephris sp.	57.66666667	31/07/2014	8	7	cryptophytes
Rhodomonas sp.	0	31/07/2014	8	7	cryptophytes
Anabena fl.-aq.	0	31/07/2014	8	7	cyanobacteria
Anabena solitaria	0	31/07/2014	8	7	cyanobacteria
Aphanizomenon fl.-aq.	0	31/07/2014	8	7	cyanobacteria
Aphanocapsa elachista	0	31/07/2014	8	7	cyanobacteria
Aphanothece sp.	0	31/07/2014	8	7	cyanobacteria
Chroococcus sp.	0	31/07/2014	8	7	cyanobacteria
Coelosphaerium sp.	0	31/07/2014	8	7	cyanobacteria
Leptothrix echinata	0	31/07/2014	8	7	cyanobacteria
Microcystis aerug.	0	31/07/2014	8	7	cyanobacteria
Microcystis sp.	0	31/07/2014	8	7	cyanobacteria
Pseudoanabena sp.	0	31/07/2014	8	7	cyanobacteria
Spirulina sp.	0	31/07/2014	8	7	cyanobacteria
Synechococcus	690	31/07/2014	8	7	cyanobacteria
Woronichinia aponina	0	31/07/2014	8	7	cyanobacteria
Woronichinia naeg.	0	31/07/2014	8	7	cyanobacteria
Closterium ac. var. variab.	0	31/07/2014	8	7	desmids
Closterium acutum	0	31/07/2014	8	7	desmids
Closterium pronum	0	31/07/2014	8	7	desmids
Closterium sp.	0	31/07/2014	8	7	desmids
Cosmarium depr. plankt.	0	31/07/2014	8	7	desmids
Cosmarium sp.	0	31/07/2014	8	7	desmids
Mougeotia sp.	0	31/07/2014	8	7	desmids
Staurastrum sp.	14	31/07/2014	8	7	desmids
Achnanthes sp.	0	31/07/2014	8	7	diatoms
Asterionella formosa	14	31/07/2014	8	7	diatoms
Cocconeis sp.	0	31/07/2014	8	7	diatoms
Cyclotella comta	70.33333333	31/07/2014	8	7	diatoms
Cyclotella klein bis 7µ Ø	115	31/07/2014	8	7	diatoms
Cyclotella sp.	0	31/07/2014	8	7	diatoms
Cymbella sp.	0	31/07/2014	8	7	diatoms
Diatoma sp.	0	31/07/2014	8	7	diatoms
Fragilaria capucina	0	31/07/2014	8	7	diatoms
Fragilaria crotonensis	0	31/07/2014	8	7	diatoms
Melosira sp.	0	31/07/2014	8	7	diatoms
Navicula sp.	0	31/07/2014	8	7	diatoms
Nitzschia acicularis	0	31/07/2014	8	7	diatoms
Nitzschia sp.	0	31/07/2014	8	7	diatoms
Stephanodiscus klein bis 7µ Ø	57.66666667	31/07/2014	8	7	diatoms
Stephanodiscus sp.	0	31/07/2014	8	7	diatoms
Synedra acus	0	31/07/2014	8	7	diatoms
Synedra acus ang.	0	31/07/2014	8	7	diatoms
Synedra cyclopum	0	31/07/2014	8	7	diatoms
Ceratium hirundinella	0	31/07/2014	8	7	dinoflagellates
Cysten von Ceratium	0	31/07/2014	8	7	dinoflagellates
Gymnodinium helv.	0	31/07/2014	8	7	dinoflagellates
Gymnodinium lantzschii	0	31/07/2014	8	7	dinoflagellates
Gymnodinium sp.	0	31/07/2014	8	7	dinoflagellates
Peridinium aciculiferum	14	31/07/2014	8	7	dinoflagellates
Peridinium cinctum	0	31/07/2014	8	7	dinoflagellates
Peridinium willei	0	31/07/2014	8	7	dinoflagellates
Sonstige Dinocysten	0	31/07/2014	8	7	dinoflagellates
Euglena sp.	0	31/07/2014	8	7	euglenophytes
Ankyra ancora	0	31/07/2014	8	7	greens
Botryococcus braunii	0	31/07/2014	8	7	greens
Carteria sp. (Tetraselmis)	0	31/07/2014	8	7	greens
Chlamydomonas sp.	0	31/07/2014	8	7	greens
Chlorella sp.	0	31/07/2014	8	7	greens
Coelastrum microporum	0	31/07/2014	8	7	greens
Coelastrum reticulatum	0	31/07/2014	8	7	greens
Crucigenia sp.	0	31/07/2014	8	7	greens
Crucigenia tetrapedia	0	31/07/2014	8	7	greens
Div. Chloro 7 µ Ø	0	31/07/2014	8	7	greens
Elakatothrix gelatinosa	0	31/07/2014	8	7	greens
Eutetramorus sp.	0	31/07/2014	8	7	greens
Hormidium	0	31/07/2014	8	7	greens
Kirchneriella sp.	0	31/07/2014	8	7	greens
Lagerheimia sp.	172.6666667	31/07/2014	8	7	greens
Monoraphidium minutum	0	31/07/2014	8	7	greens
Monoraphidium sp.	0	31/07/2014	8	7	greens
Nephrocytium	0	31/07/2014	8	7	greens
Pediastrum boryanum	0	31/07/2014	8	7	greens
Pediastrum duplex	0	31/07/2014	8	7	greens
Phacotus sp.	70.33333333	31/07/2014	8	7	greens
Scenedesmus acuminatus	0	31/07/2014	8	7	greens
Scenedesmus armatus	0	31/07/2014	8	7	greens
Scenedesmus linearis	0	31/07/2014	8	7	greens
Tetraedron minimum	0	31/07/2014	8	7	greens
Bicosoeca sp.	0	31/07/2014	8	8.5	chrysophytes
Bitrichia chodatii	57.66666667	31/07/2014	8	8.5	chrysophytes
Chromulina sp.	0	31/07/2014	8	8.5	chrysophytes
Dinobryon bavaricum	0	31/07/2014	8	8.5	chrysophytes
Dinobryon divergens	0	31/07/2014	8	8.5	chrysophytes
Dinobryon soziale	0	31/07/2014	8	8.5	chrysophytes
Div. Chrysoflagellaten	0	31/07/2014	8	8.5	chrysophytes
Erkenia sp.	0	31/07/2014	8	8.5	chrysophytes
Kephyrion sp.	0	31/07/2014	8	8.5	chrysophytes
Mallomonas acaroides	0	31/07/2014	8	8.5	chrysophytes
Ochromonas sp.	0	31/07/2014	8	8.5	chrysophytes
Pseudopedinella erk.	0	31/07/2014	8	8.5	chrysophytes
Salpingoeca sp.	0	31/07/2014	8	8.5	chrysophytes
Chroomonas sp.	0	31/07/2014	8	8.5	cryptophytes
Cryptomonas sp.	14	31/07/2014	8	8.5	cryptophytes
Cyathomonas truncata	0	31/07/2014	8	8.5	cryptophytes
Div. Cryptophyceen	0	31/07/2014	8	8.5	cryptophytes
Katablephris sp.	0	31/07/2014	8	8.5	cryptophytes
Rhodomonas sp.	0	31/07/2014	8	8.5	cryptophytes
Anabena fl.-aq.	0	31/07/2014	8	8.5	cyanobacteria
Anabena solitaria	0	31/07/2014	8	8.5	cyanobacteria
Aphanizomenon fl.-aq.	0	31/07/2014	8	8.5	cyanobacteria
Aphanocapsa elachista	0	31/07/2014	8	8.5	cyanobacteria
Aphanothece sp.	0	31/07/2014	8	8.5	cyanobacteria
Chroococcus sp.	0	31/07/2014	8	8.5	cyanobacteria
Coelosphaerium sp.	0	31/07/2014	8	8.5	cyanobacteria
Leptothrix echinata	0	31/07/2014	8	8.5	cyanobacteria
Microcystis aerug.	0	31/07/2014	8	8.5	cyanobacteria
Microcystis sp.	0	31/07/2014	8	8.5	cyanobacteria
Pseudoanabena sp.	0	31/07/2014	8	8.5	cyanobacteria
Spirulina sp.	0	31/07/2014	8	8.5	cyanobacteria
Synechococcus	287.6666667	31/07/2014	8	8.5	cyanobacteria
Woronichinia aponina	0	31/07/2014	8	8.5	cyanobacteria
Woronichinia naeg.	0	31/07/2014	8	8.5	cyanobacteria
Closterium ac. var. variab.	0	31/07/2014	8	8.5	desmids
Closterium acutum	0	31/07/2014	8	8.5	desmids
Closterium pronum	0	31/07/2014	8	8.5	desmids
Closterium sp.	0	31/07/2014	8	8.5	desmids
Cosmarium depr. plankt.	0	31/07/2014	8	8.5	desmids
Cosmarium sp.	0	31/07/2014	8	8.5	desmids
Mougeotia sp.	0	31/07/2014	8	8.5	desmids
Staurastrum sp.	0	31/07/2014	8	8.5	desmids
Achnanthes sp.	0	31/07/2014	8	8.5	diatoms
Asterionella formosa	14	31/07/2014	8	8.5	diatoms
Cocconeis sp.	0	31/07/2014	8	8.5	diatoms
Cyclotella comta	42	31/07/2014	8	8.5	diatoms
Cyclotella klein bis 7µ Ø	0	31/07/2014	8	8.5	diatoms
Cyclotella sp.	0	31/07/2014	8	8.5	diatoms
Cymbella sp.	0	31/07/2014	8	8.5	diatoms
Diatoma sp.	0	31/07/2014	8	8.5	diatoms
Fragilaria capucina	0	31/07/2014	8	8.5	diatoms
Fragilaria crotonensis	0	31/07/2014	8	8.5	diatoms
Melosira sp.	0	31/07/2014	8	8.5	diatoms
Navicula sp.	0	31/07/2014	8	8.5	diatoms
Nitzschia acicularis	0	31/07/2014	8	8.5	diatoms
Nitzschia sp.	0	31/07/2014	8	8.5	diatoms
Stephanodiscus klein bis 7µ Ø	0	31/07/2014	8	8.5	diatoms
Stephanodiscus sp.	0	31/07/2014	8	8.5	diatoms
Synedra acus	0	31/07/2014	8	8.5	diatoms
Synedra acus ang.	0	31/07/2014	8	8.5	diatoms
Synedra cyclopum	0	31/07/2014	8	8.5	diatoms
Ceratium hirundinella	0	31/07/2014	8	8.5	dinoflagellates
Cysten von Ceratium	0	31/07/2014	8	8.5	dinoflagellates
Gymnodinium helv.	14	31/07/2014	8	8.5	dinoflagellates
Gymnodinium lantzschii	0	31/07/2014	8	8.5	dinoflagellates
Gymnodinium sp.	0	31/07/2014	8	8.5	dinoflagellates
Peridinium aciculiferum	0	31/07/2014	8	8.5	dinoflagellates
Peridinium cinctum	0	31/07/2014	8	8.5	dinoflagellates
Peridinium willei	0	31/07/2014	8	8.5	dinoflagellates
Sonstige Dinocysten	0	31/07/2014	8	8.5	dinoflagellates
Euglena sp.	0	31/07/2014	8	8.5	euglenophytes
Ankyra ancora	0	31/07/2014	8	8.5	greens
Botryococcus braunii	0	31/07/2014	8	8.5	greens
Carteria sp. (Tetraselmis)	0	31/07/2014	8	8.5	greens
Chlamydomonas sp.	0	31/07/2014	8	8.5	greens
Chlorella sp.	0	31/07/2014	8	8.5	greens
Coelastrum microporum	0	31/07/2014	8	8.5	greens
Coelastrum reticulatum	0	31/07/2014	8	8.5	greens
Crucigenia sp.	0	31/07/2014	8	8.5	greens
Crucigenia tetrapedia	230	31/07/2014	8	8.5	greens
Div. Chloro 7 µ Ø	0	31/07/2014	8	8.5	greens
Elakatothrix gelatinosa	0	31/07/2014	8	8.5	greens
Eutetramorus sp.	0	31/07/2014	8	8.5	greens
Hormidium	0	31/07/2014	8	8.5	greens
Kirchneriella sp.	0	31/07/2014	8	8.5	greens
Lagerheimia sp.	0	31/07/2014	8	8.5	greens
Monoraphidium minutum	0	31/07/2014	8	8.5	greens
Monoraphidium sp.	0	31/07/2014	8	8.5	greens
Nephrocytium	0	31/07/2014	8	8.5	greens
Pediastrum boryanum	0	31/07/2014	8	8.5	greens
Pediastrum duplex	0	31/07/2014	8	8.5	greens
Phacotus sp.	98.33333333	31/07/2014	8	8.5	greens
Scenedesmus acuminatus	0	31/07/2014	8	8.5	greens
Scenedesmus armatus	0	31/07/2014	8	8.5	greens
Scenedesmus linearis	0	31/07/2014	8	8.5	greens
Tetraedron minimum	0	31/07/2014	8	8.5	greens
Bicosoeca sp.	0	04/08/2014	12	1	chrysophytes
Bitrichia chodatii	230	04/08/2014	12	1	chrysophytes
Chromulina sp.	0	04/08/2014	12	1	chrysophytes
Dinobryon bavaricum	0	04/08/2014	12	1	chrysophytes
Dinobryon divergens	1377	04/08/2014	12	1	chrysophytes
Dinobryon soziale	0	04/08/2014	12	1	chrysophytes
Div. Chrysoflagellaten	115	04/08/2014	12	1	chrysophytes
Erkenia sp.	1725	04/08/2014	12	1	chrysophytes
Kephyrion sp.	57.66666667	04/08/2014	12	1	chrysophytes
Mallomonas acaroides	56.33333333	04/08/2014	12	1	chrysophytes
Ochromonas sp.	0	04/08/2014	12	1	chrysophytes
Pseudopedinella erk.	57.66666667	04/08/2014	12	1	chrysophytes
Salpingoeca sp.	0	04/08/2014	12	1	chrysophytes
Chroomonas sp.	0	04/08/2014	12	1	cryptophytes
Cryptomonas sp.	126.3333333	04/08/2014	12	1	cryptophytes
Cyathomonas truncata	0	04/08/2014	12	1	cryptophytes
Div. Cryptophyceen	0	04/08/2014	12	1	cryptophytes
Katablephris sp.	57.66666667	04/08/2014	12	1	cryptophytes
Rhodomonas sp.	345	04/08/2014	12	1	cryptophytes
Anabena fl.-aq.	0	04/08/2014	12	1	cyanobacteria
Anabena solitaria	239	04/08/2014	12	1	cyanobacteria
Aphanizomenon fl.-aq.	0	04/08/2014	12	1	cyanobacteria
Aphanocapsa elachista	0	04/08/2014	12	1	cyanobacteria
Aphanothece sp.	0	04/08/2014	12	1	cyanobacteria
Chroococcus sp.	0	04/08/2014	12	1	cyanobacteria
Coelosphaerium sp.	0	04/08/2014	12	1	cyanobacteria
Leptothrix echinata	0	04/08/2014	12	1	cyanobacteria
Microcystis aerug.	0	04/08/2014	12	1	cyanobacteria
Microcystis sp.	0	04/08/2014	12	1	cyanobacteria
Pseudoanabena sp.	0	04/08/2014	12	1	cyanobacteria
Spirulina sp.	0	04/08/2014	12	1	cyanobacteria
Synechococcus	7666.666667	04/08/2014	12	1	cyanobacteria
Woronichinia aponina	0	04/08/2014	12	1	cyanobacteria
Woronichinia naeg.	0	04/08/2014	12	1	cyanobacteria
Closterium ac. var. variab.	0	04/08/2014	12	1	desmids
Closterium acutum	0	04/08/2014	12	1	desmids
Closterium pronum	0	04/08/2014	12	1	desmids
Closterium sp.	0	04/08/2014	12	1	desmids
Cosmarium depr. plankt.	14	04/08/2014	12	1	desmids
Cosmarium sp.	0	04/08/2014	12	1	desmids
Mougeotia sp.	0	04/08/2014	12	1	desmids
Staurastrum sp.	28	04/08/2014	12	1	desmids
Achnanthes sp.	0	04/08/2014	12	1	diatoms
Asterionella formosa	56.33333333	04/08/2014	12	1	diatoms
Cocconeis sp.	0	04/08/2014	12	1	diatoms
Cyclotella comta	112.3333333	04/08/2014	12	1	diatoms
Cyclotella klein bis 7µ Ø	57.66666667	04/08/2014	12	1	diatoms
Cyclotella sp.	0	04/08/2014	12	1	diatoms
Cymbella sp.	0	04/08/2014	12	1	diatoms
Diatoma sp.	0	04/08/2014	12	1	diatoms
Fragilaria capucina	0	04/08/2014	12	1	diatoms
Fragilaria crotonensis	0	04/08/2014	12	1	diatoms
Melosira sp.	0	04/08/2014	12	1	diatoms
Navicula sp.	0	04/08/2014	12	1	diatoms
Nitzschia acicularis	0	04/08/2014	12	1	diatoms
Nitzschia sp.	0	04/08/2014	12	1	diatoms
Stephanodiscus klein bis 7µ Ø	115	04/08/2014	12	1	diatoms
Stephanodiscus sp.	0	04/08/2014	12	1	diatoms
Synedra acus	0	04/08/2014	12	1	diatoms
Synedra acus ang.	0	04/08/2014	12	1	diatoms
Synedra cyclopum	98.33333333	04/08/2014	12	1	diatoms
Ceratium hirundinella	0	04/08/2014	12	1	dinoflagellates
Cysten von Ceratium	0	04/08/2014	12	1	dinoflagellates
Gymnodinium helv.	0	04/08/2014	12	1	dinoflagellates
Gymnodinium lantzschii	0	04/08/2014	12	1	dinoflagellates
Gymnodinium sp.	14	04/08/2014	12	1	dinoflagellates
Peridinium aciculiferum	42	04/08/2014	12	1	dinoflagellates
Peridinium cinctum	0	04/08/2014	12	1	dinoflagellates
Peridinium willei	0	04/08/2014	12	1	dinoflagellates
Sonstige Dinocysten	0	04/08/2014	12	1	dinoflagellates
Euglena sp.	0	04/08/2014	12	1	euglenophytes
Ankyra ancora	28	04/08/2014	12	1	greens
Botryococcus braunii	0	04/08/2014	12	1	greens
Carteria sp. (Tetraselmis)	0	04/08/2014	12	1	greens
Chlamydomonas sp.	0	04/08/2014	12	1	greens
Chlorella sp.	0	04/08/2014	12	1	greens
Coelastrum microporum	0	04/08/2014	12	1	greens
Coelastrum reticulatum	0	04/08/2014	12	1	greens
Crucigenia sp.	0	04/08/2014	12	1	greens
Crucigenia tetrapedia	230	04/08/2014	12	1	greens
Div. Chloro 7 µ Ø	0	04/08/2014	12	1	greens
Elakatothrix gelatinosa	84.33333333	04/08/2014	12	1	greens
Eutetramorus sp.	0	04/08/2014	12	1	greens
Hormidium	281	04/08/2014	12	1	greens
Kirchneriella sp.	0	04/08/2014	12	1	greens
Lagerheimia sp.	115	04/08/2014	12	1	greens
Monoraphidium minutum	0	04/08/2014	12	1	greens
Monoraphidium sp.	0	04/08/2014	12	1	greens
Nephrocytium	57.66666667	04/08/2014	12	1	greens
Pediastrum boryanum	0	04/08/2014	12	1	greens
Pediastrum duplex	0	04/08/2014	12	1	greens
Phacotus sp.	84.33333333	04/08/2014	12	1	greens
Scenedesmus acuminatus	0	04/08/2014	12	1	greens
Scenedesmus armatus	0	04/08/2014	12	1	greens
Scenedesmus linearis	920	04/08/2014	12	1	greens
Tetraedron minimum	0	04/08/2014	12	1	greens
Bicosoeca sp.	0	04/08/2014	12	2.5	chrysophytes
Bitrichia chodatii	287.6666667	04/08/2014	12	2.5	chrysophytes
Chromulina sp.	0	04/08/2014	12	2.5	chrysophytes
Dinobryon bavaricum	0	04/08/2014	12	2.5	chrysophytes
Dinobryon divergens	1067.666667	04/08/2014	12	2.5	chrysophytes
Dinobryon soziale	0	04/08/2014	12	2.5	chrysophytes
Div. Chrysoflagellaten	115	04/08/2014	12	2.5	chrysophytes
Erkenia sp.	2012.666667	04/08/2014	12	2.5	chrysophytes
Kephyrion sp.	0	04/08/2014	12	2.5	chrysophytes
Mallomonas acaroides	0	04/08/2014	12	2.5	chrysophytes
Ochromonas sp.	0	04/08/2014	12	2.5	chrysophytes
Pseudopedinella erk.	0	04/08/2014	12	2.5	chrysophytes
Salpingoeca sp.	0	04/08/2014	12	2.5	chrysophytes
Chroomonas sp.	0	04/08/2014	12	2.5	cryptophytes
Cryptomonas sp.	253	04/08/2014	12	2.5	cryptophytes
Cyathomonas truncata	0	04/08/2014	12	2.5	cryptophytes
Div. Cryptophyceen	0	04/08/2014	12	2.5	cryptophytes
Katablephris sp.	230	04/08/2014	12	2.5	cryptophytes
Rhodomonas sp.	920	04/08/2014	12	2.5	cryptophytes
Anabena fl.-aq.	0	04/08/2014	12	2.5	cyanobacteria
Anabena solitaria	0	04/08/2014	12	2.5	cyanobacteria
Aphanizomenon fl.-aq.	562	04/08/2014	12	2.5	cyanobacteria
Aphanocapsa elachista	0	04/08/2014	12	2.5	cyanobacteria
Aphanothece sp.	0	04/08/2014	12	2.5	cyanobacteria
Chroococcus sp.	0	04/08/2014	12	2.5	cyanobacteria
Coelosphaerium sp.	0	04/08/2014	12	2.5	cyanobacteria
Leptothrix echinata	0	04/08/2014	12	2.5	cyanobacteria
Microcystis aerug.	0	04/08/2014	12	2.5	cyanobacteria
Microcystis sp.	0	04/08/2014	12	2.5	cyanobacteria
Pseudoanabena sp.	0	04/08/2014	12	2.5	cyanobacteria
Spirulina sp.	0	04/08/2014	12	2.5	cyanobacteria
Synechococcus	8510	04/08/2014	12	2.5	cyanobacteria
Woronichinia aponina	0	04/08/2014	12	2.5	cyanobacteria
Woronichinia naeg.	0	04/08/2014	12	2.5	cyanobacteria
Closterium ac. var. variab.	0	04/08/2014	12	2.5	desmids
Closterium acutum	0	04/08/2014	12	2.5	desmids
Closterium pronum	0	04/08/2014	12	2.5	desmids
Closterium sp.	0	04/08/2014	12	2.5	desmids
Cosmarium depr. plankt.	14	04/08/2014	12	2.5	desmids
Cosmarium sp.	0	04/08/2014	12	2.5	desmids
Mougeotia sp.	0	04/08/2014	12	2.5	desmids
Staurastrum sp.	0	04/08/2014	12	2.5	desmids
Achnanthes sp.	0	04/08/2014	12	2.5	diatoms
Asterionella formosa	28	04/08/2014	12	2.5	diatoms
Cocconeis sp.	0	04/08/2014	12	2.5	diatoms
Cyclotella comta	42	04/08/2014	12	2.5	diatoms
Cyclotella klein bis 7µ Ø	287.6666667	04/08/2014	12	2.5	diatoms
Cyclotella sp.	0	04/08/2014	12	2.5	diatoms
Cymbella sp.	0	04/08/2014	12	2.5	diatoms
Diatoma sp.	0	04/08/2014	12	2.5	diatoms
Fragilaria capucina	0	04/08/2014	12	2.5	diatoms
Fragilaria crotonensis	0	04/08/2014	12	2.5	diatoms
Melosira sp.	0	04/08/2014	12	2.5	diatoms
Navicula sp.	0	04/08/2014	12	2.5	diatoms
Nitzschia acicularis	0	04/08/2014	12	2.5	diatoms
Nitzschia sp.	0	04/08/2014	12	2.5	diatoms
Stephanodiscus klein bis 7µ Ø	230	04/08/2014	12	2.5	diatoms
Stephanodiscus sp.	0	04/08/2014	12	2.5	diatoms
Synedra acus	0	04/08/2014	12	2.5	diatoms
Synedra acus ang.	0	04/08/2014	12	2.5	diatoms
Synedra cyclopum	14	04/08/2014	12	2.5	diatoms
Ceratium hirundinella	28	04/08/2014	12	2.5	dinoflagellates
Cysten von Ceratium	0	04/08/2014	12	2.5	dinoflagellates
Gymnodinium helv.	0	04/08/2014	12	2.5	dinoflagellates
Gymnodinium lantzschii	28	04/08/2014	12	2.5	dinoflagellates
Gymnodinium sp.	0	04/08/2014	12	2.5	dinoflagellates
Peridinium aciculiferum	14	04/08/2014	12	2.5	dinoflagellates
Peridinium cinctum	0	04/08/2014	12	2.5	dinoflagellates
Peridinium willei	0	04/08/2014	12	2.5	dinoflagellates
Sonstige Dinocysten	0	04/08/2014	12	2.5	dinoflagellates
Euglena sp.	0	04/08/2014	12	2.5	euglenophytes
Ankyra ancora	42	04/08/2014	12	2.5	greens
Botryococcus braunii	0	04/08/2014	12	2.5	greens
Carteria sp. (Tetraselmis)	0	04/08/2014	12	2.5	greens
Chlamydomonas sp.	172.6666667	04/08/2014	12	2.5	greens
Chlorella sp.	0	04/08/2014	12	2.5	greens
Coelastrum microporum	0	04/08/2014	12	2.5	greens
Coelastrum reticulatum	0	04/08/2014	12	2.5	greens
Crucigenia sp.	0	04/08/2014	12	2.5	greens
Crucigenia tetrapedia	0	04/08/2014	12	2.5	greens
Div. Chloro 7 µ Ø	0	04/08/2014	12	2.5	greens
Elakatothrix gelatinosa	56.33333333	04/08/2014	12	2.5	greens
Eutetramorus sp.	0	04/08/2014	12	2.5	greens
Hormidium	196.6666667	04/08/2014	12	2.5	greens
Kirchneriella sp.	0	04/08/2014	12	2.5	greens
Lagerheimia sp.	230	04/08/2014	12	2.5	greens
Monoraphidium minutum	0	04/08/2014	12	2.5	greens
Monoraphidium sp.	0	04/08/2014	12	2.5	greens
Nephrocytium	57.66666667	04/08/2014	12	2.5	greens
Pediastrum boryanum	0	04/08/2014	12	2.5	greens
Pediastrum duplex	0	04/08/2014	12	2.5	greens
Phacotus sp.	126.3333333	04/08/2014	12	2.5	greens
Scenedesmus acuminatus	0	04/08/2014	12	2.5	greens
Scenedesmus armatus	0	04/08/2014	12	2.5	greens
Scenedesmus linearis	0	04/08/2014	12	2.5	greens
Tetraedron minimum	0	04/08/2014	12	2.5	greens
Bicosoeca sp.	0	04/08/2014	12	4	chrysophytes
Bitrichia chodatii	115	04/08/2014	12	4	chrysophytes
Chromulina sp.	0	04/08/2014	12	4	chrysophytes
Dinobryon bavaricum	0	04/08/2014	12	4	chrysophytes
Dinobryon divergens	660.3333333	04/08/2014	12	4	chrysophytes
Dinobryon soziale	0	04/08/2014	12	4	chrysophytes
Div. Chrysoflagellaten	115	04/08/2014	12	4	chrysophytes
Erkenia sp.	2530	04/08/2014	12	4	chrysophytes
Kephyrion sp.	0	04/08/2014	12	4	chrysophytes
Mallomonas acaroides	56.33333333	04/08/2014	12	4	chrysophytes
Ochromonas sp.	0	04/08/2014	12	4	chrysophytes
Pseudopedinella erk.	0	04/08/2014	12	4	chrysophytes
Salpingoeca sp.	0	04/08/2014	12	4	chrysophytes
Chroomonas sp.	0	04/08/2014	12	4	cryptophytes
Cryptomonas sp.	309	04/08/2014	12	4	cryptophytes
Cyathomonas truncata	0	04/08/2014	12	4	cryptophytes
Div. Cryptophyceen	0	04/08/2014	12	4	cryptophytes
Katablephris sp.	287.6666667	04/08/2014	12	4	cryptophytes
Rhodomonas sp.	517.6666667	04/08/2014	12	4	cryptophytes
Anabena fl.-aq.	0	04/08/2014	12	4	cyanobacteria
Anabena solitaria	0	04/08/2014	12	4	cyanobacteria
Aphanizomenon fl.-aq.	281	04/08/2014	12	4	cyanobacteria
Aphanocapsa elachista	0	04/08/2014	12	4	cyanobacteria
Aphanothece sp.	0	04/08/2014	12	4	cyanobacteria
Chroococcus sp.	0	04/08/2014	12	4	cyanobacteria
Coelosphaerium sp.	0	04/08/2014	12	4	cyanobacteria
Leptothrix echinata	0	04/08/2014	12	4	cyanobacteria
Microcystis aerug.	0	04/08/2014	12	4	cyanobacteria
Microcystis sp.	0	04/08/2014	12	4	cyanobacteria
Pseudoanabena sp.	0	04/08/2014	12	4	cyanobacteria
Spirulina sp.	0	04/08/2014	12	4	cyanobacteria
Synechococcus	5347.666667	04/08/2014	12	4	cyanobacteria
Woronichinia aponina	0	04/08/2014	12	4	cyanobacteria
Woronichinia naeg.	0	04/08/2014	12	4	cyanobacteria
Closterium ac. var. variab.	0	04/08/2014	12	4	desmids
Closterium acutum	0	04/08/2014	12	4	desmids
Closterium pronum	0	04/08/2014	12	4	desmids
Closterium sp.	0	04/08/2014	12	4	desmids
Cosmarium depr. plankt.	28	04/08/2014	12	4	desmids
Cosmarium sp.	0	04/08/2014	12	4	desmids
Mougeotia sp.	0	04/08/2014	12	4	desmids
Staurastrum sp.	0	04/08/2014	12	4	desmids
Achnanthes sp.	0	04/08/2014	12	4	diatoms
Asterionella formosa	14	04/08/2014	12	4	diatoms
Cocconeis sp.	0	04/08/2014	12	4	diatoms
Cyclotella comta	98.33333333	04/08/2014	12	4	diatoms
Cyclotella klein bis 7µ Ø	115	04/08/2014	12	4	diatoms
Cyclotella sp.	0	04/08/2014	12	4	diatoms
Cymbella sp.	0	04/08/2014	12	4	diatoms
Diatoma sp.	0	04/08/2014	12	4	diatoms
Fragilaria capucina	0	04/08/2014	12	4	diatoms
Fragilaria crotonensis	0	04/08/2014	12	4	diatoms
Melosira sp.	0	04/08/2014	12	4	diatoms
Navicula sp.	0	04/08/2014	12	4	diatoms
Nitzschia acicularis	0	04/08/2014	12	4	diatoms
Nitzschia sp.	0	04/08/2014	12	4	diatoms
Stephanodiscus klein bis 7µ Ø	172.6666667	04/08/2014	12	4	diatoms
Stephanodiscus sp.	0	04/08/2014	12	4	diatoms
Synedra acus	0	04/08/2014	12	4	diatoms
Synedra acus ang.	0	04/08/2014	12	4	diatoms
Synedra cyclopum	28	04/08/2014	12	4	diatoms
Ceratium hirundinella	14	04/08/2014	12	4	dinoflagellates
Cysten von Ceratium	0	04/08/2014	12	4	dinoflagellates
Gymnodinium helv.	0	04/08/2014	12	4	dinoflagellates
Gymnodinium lantzschii	0	04/08/2014	12	4	dinoflagellates
Gymnodinium sp.	0	04/08/2014	12	4	dinoflagellates
Peridinium aciculiferum	14	04/08/2014	12	4	dinoflagellates
Peridinium cinctum	0	04/08/2014	12	4	dinoflagellates
Peridinium willei	0	04/08/2014	12	4	dinoflagellates
Sonstige Dinocysten	0	04/08/2014	12	4	dinoflagellates
Euglena sp.	0	04/08/2014	12	4	euglenophytes
Ankyra ancora	0	04/08/2014	12	4	greens
Botryococcus braunii	0	04/08/2014	12	4	greens
Carteria sp. (Tetraselmis)	0	04/08/2014	12	4	greens
Chlamydomonas sp.	115	04/08/2014	12	4	greens
Chlorella sp.	0	04/08/2014	12	4	greens
Coelastrum microporum	0	04/08/2014	12	4	greens
Coelastrum reticulatum	0	04/08/2014	12	4	greens
Crucigenia sp.	0	04/08/2014	12	4	greens
[truncated: 19,697 more rows]
